# Supplementary material for: Prunus Hexokinase 3 genes alter primary C-metabolism and promote drought and salt stress tolerance in Arabidopsis transgenic plants
Source: PubMed Central journal article supplement (PMC8007757; doi:10.1038/s41598-021-86535-1), 2021-03-29
Supplement: 41598_2021_86535_MOESM1_ESM.pdf [file 41598_2021_86535_MOESM1_ESM.pdf]

## Title:

# ***Prunus Hexokinase 3* genes alter primary C-metabolism and promote drought and salt stress tolerance in *Arabidopsis transgenic* plants**

**Jorge Pérez-Díaz<sup>1</sup>, Willian Batista-Silva<sup>2</sup>, Rubén Almada<sup>3</sup>, David B. Medeiros<sup>2</sup>, Stéphanie Arrivault<sup>4</sup>, Francisco Correa<sup>1</sup>, Adriana Bastías<sup>5</sup>, Pamela Rojas<sup>1</sup>, María Francisca Beltrán<sup>1</sup>, María Francisca Pozo<sup>1</sup>, Wagner L. Araújo<sup>2</sup> and Boris Sagredo<sup>1</sup>.**

<sup>1</sup>Instituto de Investigaciones Agropecuarias CRI Rayentué, Av. Salamanca s/n, Sector Los Choapinos, Rengo, Chile

<sup>2</sup>Max Planck Partner Group at the Departamento de Biología Vegetal, Universidade Federal de Viçosa, 36570-900, Viçosa-MG, Brazil

<sup>3</sup>Centro de Estudios Avanzados en Fruticultura, CEAF, Camino Las Parcelas 882, Sector Los Choapinos, Rengo, Chile

<sup>4</sup>Max Planck Institute of Molecular Plant Physiology, Am Mühlenberg 1, D-14476 Potsdam-Golm, Germany

<sup>5</sup>Universidad Autónoma de Chile. Av. Pedro de Valdivia 425, Providencia, Santiago, Chile

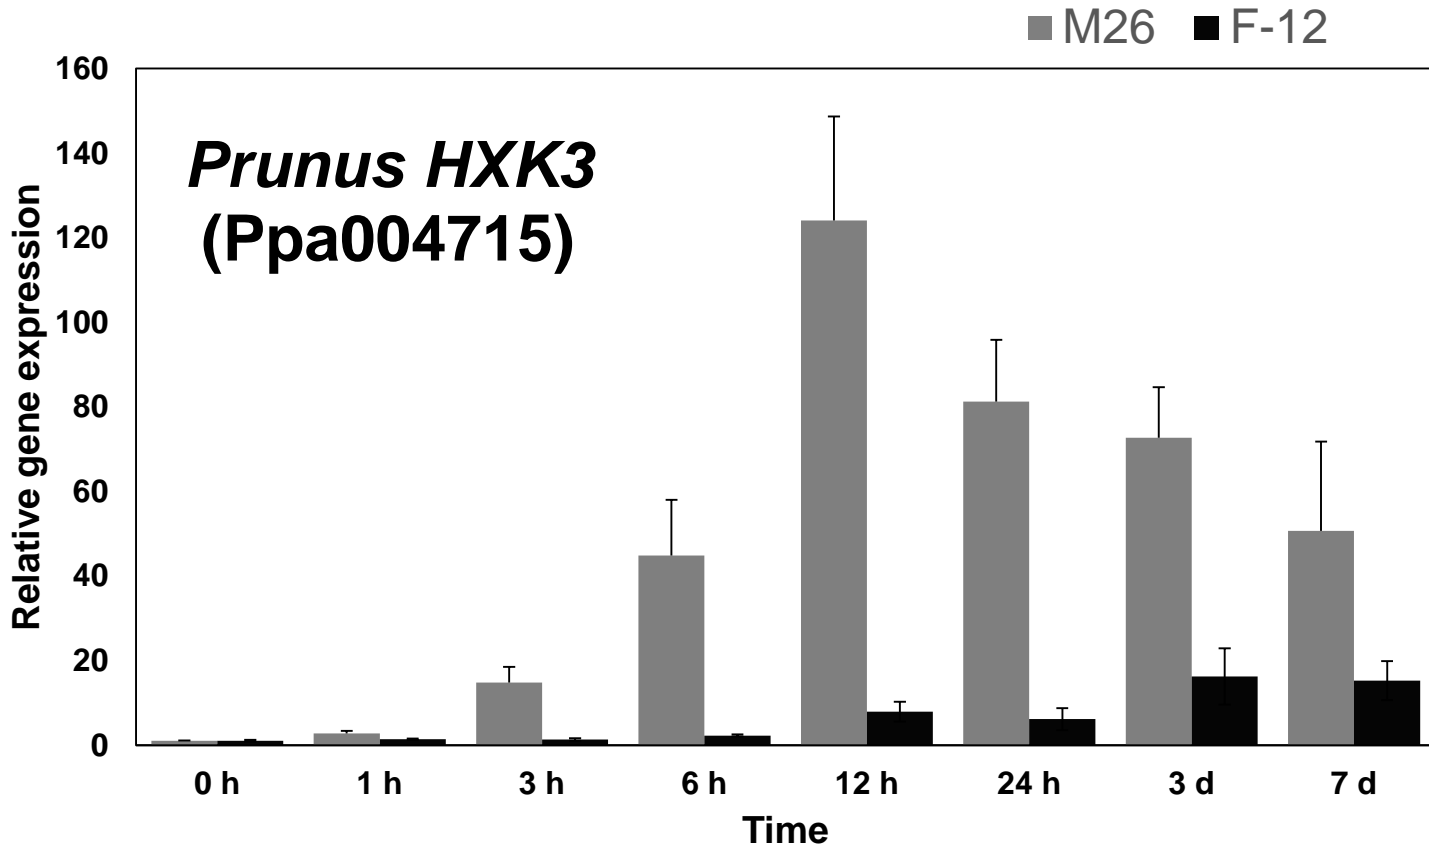

**Figure S1. Expression patterns of the *HXK3* genes in *Prunus* plants subjected to hypoxia.** Gene expression was examined by qRT-PCR using total RNA from rootstock roots of Mariana 2624 and Mazzard F12/1 after treatment with hypoxia for 0, 1, 3, 6, 12, 24, 72 and 168 h. They are expressed as mean relative expression values  $\pm$  standard error ( $n=3$ ), normalized with *TEF2* as a constitutively expressed gene.

>Prunus\_persica|Prupe.1G36600 HXX3 promoter

AAAAAGTAAAAATAAAAATAAAAATCAAATAATAGGTCATACTTTTATTTAAACATAACTATCCATATTTATTTTTTCTTAAATTCAGAAAAAAAAAAATCAATTAGCACATA  
CGTGAGTATGTTCCAAGGGGCTTGTGGTACAGAAAGAGCAATGGTATGTATGGCATAACCGTTTCTATCAAGTTCCCAAAGTAATCAATACAGAAAAATGCCAATCCAAC  
TATGGTAGGGTAGGATGGCCACGACTTAAAAAGTTGATGGAAGTCTCAGAATTTTGAAACCAAAATCATTAAAAAGGATTAAGGATAAGAAGTATCCATCTTTCATCAA  
TCATTTATCACATTAACAACAACAAAACATCTTAATAACCTAGCCCAGCCCTGAAGCCAGCTTAATTTATCATCGTATTTTACAAAAGATTGCTGCTGCTGCTGCTGGCG  
CTCCAAGCATATGAATATTTTACTTGTTTTATTTGGAACTATTATGGATATACTTTAAAACGACTGGAAAAACAACAATTATGGATATACTTTAAAACGACTGGA  
AAAAACAACAACATAGTTTCGAGCTACAACACCACAAAAGCACAAATCTTCGCGGTTGTGTCCCATCTACAAAACCCCATCGTATTGTCCGCCCAATCCCAACCTTTGT  
CCAAACCTCAGCTTTGTACCCAATCAAAAAACAATAAAAATAGCAAAAAATAACAAAAACAACGGGAAGGTAACGAACAGTTTAATTCCTGTTAGCTTGTTAATTGTCTT  
TCATGTCAGCTACCCAAAACACGTCGTCTTGTCTTCTTCTGAGCATTTTCGACTTTTATTATAAAAATATTAATAAAAATTACACAACCTAAAACAAAATCACAGTTGG  
GAACCTTGCCAGTTGGTTGCCAATCGACAGAAAATAAAGACCAACAATAGTACCCTATGCTCCCTCTCTGCGCCTTGTTCACTATTTTCCCTCTTCTTTCTTTTTCAT  
AGATCTTGCCTTAATACAACATG

>M.F12/1|denovo HXX3 promoter

GGTGGGTGGCAGCAGTTGGTCACTTCTCTTCTATTTTATTTGGTTCGTCCTGTTGGACTGGGGCAAAGAGAGGGACTCTTCGCCAATATCCAACACCAACCAATTCC  
AATTACAATTTTTCATAATGTTGGGTCTTCTTCTGCACTCTTGTCTTTGGTCAAATCCAACCCAGACTCAAATCCAGCCCACAACTGGCCTCAAACCTGGGCTGGAC  
CGAAACTCACAAAATCGGGCTATAATGCACATGACCCGTGGGCTTACCAACTACACATCTATCCATGTAGAGAGAGAGAGAGAGAGAGAGAGAGAGAGGGGTAGAATAGG  
ATGGCCACAACCTAAAAAGTTGATGAAAGTCTCAGAATTTTGAAACCAAGATCATTAAAAGGGATTAAGGATAAGAATTATCCACCTTCATCAATCATTATCACATTA  
ACAACAAAATAACATCTTAACAACCTAGCCCAGCCCTGAACCCAGCTTAATTTACCATCGTATTTTAAAACGAATGGAAATACAACAACATGTTGCAATCAATTCGAG  
CTATAACAACACCAAAAAGCACAGATCTTCGCTCTTGTGTCCCATCTACAAAACCCGCATCGGATTGTCCGCCCAATCCCAACCTTTGTCCAAACACTCAGCTTTGTACG  
CAATCAAAAAACAATAAAAAAGCAAAAAATACCAAAAACAACGGGAAGGTAACGATGACTAATGAACGGGCGCATAAAAAAATGATGAGTTTAATTCAGTTAGCTTGT  
AACTGTCTGTCTATTTAGCTACCCAAAACACGTCGTCTTGTCTTCTTCTTAGCATTTTCGACTTTTATTATAAAAATTAACAACCTAAAACAAAACACAGTTG  
GGAACCTTGCCAGTTGGTTGCCAATCGACAGAAAATAAAGACCAACAATAGTACCCTATGCTCCCTCTCTGTGTCTTGTTCACTATTTTCCCTCTTCTTTCTTTTTCAT  
AGATCTTGCCTTACTACAACATG

>M.2624|denovo HXX3 promoter

CTTATGGTCAAATCTAACCCAGACTCAAATCCAGCCCACAACTTGGGCTGGGCCGAAACTCACAAAATCAGACTCGTGGGCTTCCAACCTACACATCCATCCGTAGG  
GAAAGAGAGAGGGAGAGAGCAACCACAGCACATGCGATGGGACAGAAAAGAGCAATGGTATGTATGGCATGCCGTTTCTATCAAGTTCCCAAAGTAATCAATACAGAAA  
ATGCCAATCCAACCTATGGTAGGATAGGATGGCCACAACCTAAAAAGTTGATGAAAGTCTCAGAATTTAAAACCAAGATCATTAAAAAGGATTAAGGATAAGAATTATC  
CATCTTCATCATCAATCATTACCACATTAACAACAACAAAATAACATCTTAATGACCTAGCCCAGCCCTATAGATGCGATGATTGTATAAAAAGGAATTGCCGCTGCTGCT  
GGCGCTCCAAGCATATGAATATTTACTTGTTTTATTTGGTAACTATTATGGATATACTTTAAAACGAATAGAAAAACAACAACGACATGTTGCAATCAGTTTCGAG  
CTATAACAACACCAAAAAGCAAAAACACAGATCTTCTCTCTTGTGTCCCATCGTATTTGTCCGCCCAATCCAACCTTTGTCCAAACCTCAGCTTTGTACCCAGTCGAAA  
AACAATAAAAATACCAAAAACAACCTGGCACTGGTAACAATGACTAATCAACGGGCGCATCAAAAACCGATGACTAACGAACAGTTTAATTCAGTTAGCTTGTTAACCTGT  
CTGTCTGTCTAGCTACCCAAAACACGTCGTCTTGGTTCCTTCTGAGCATTTTCGACTTTTATTATAAAAATTAATAAAAATTGCAGAACCTAAAACAAAATCATAGT  
TGGGAACCTTGCCAATTTGGTTGCCAATCCACAGAAAATAAAGACCAACAATAGTACCCTATGCTCCCTCTCTGTCTTGTTCACTATTTTCCCTCTTCTTTCTTTTAAAT  
AGATCTCGCCTTACTACAAAATG

Figure S2. Nucleotide sequences of *Prunus HXX3* promoters. 992 bp upstream regions of the transcription starting sites of the *HXX3* genes.

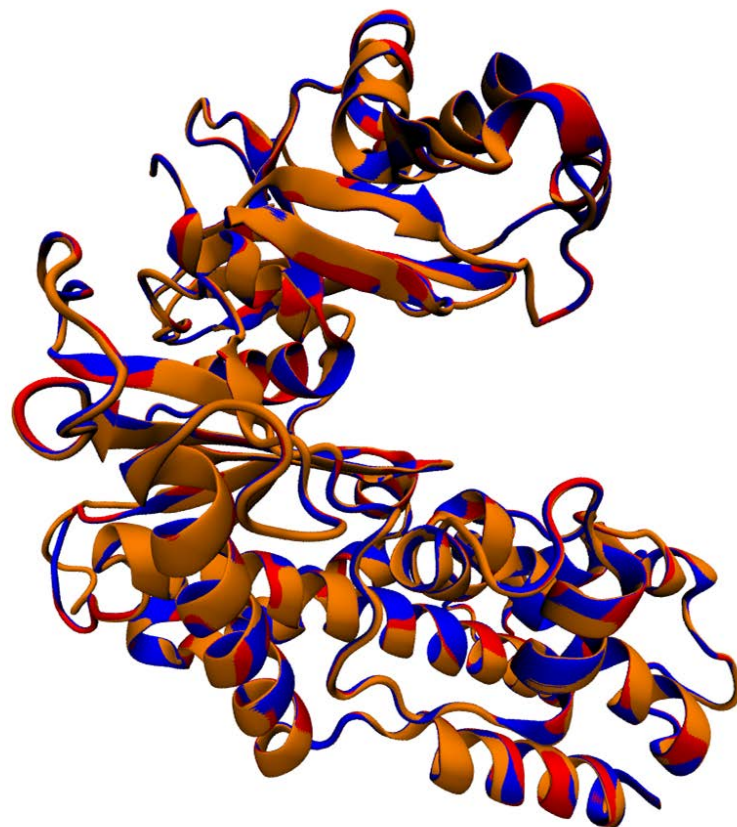

**Figure S3. Protein modeling of HXK3 proteins.** Comparison through a Richardson diagram of the structural models of the HXK3 proteins of the Mariana 2624 (red), Mazzard F12/1 (orange) and *Prunus persica* (blue).

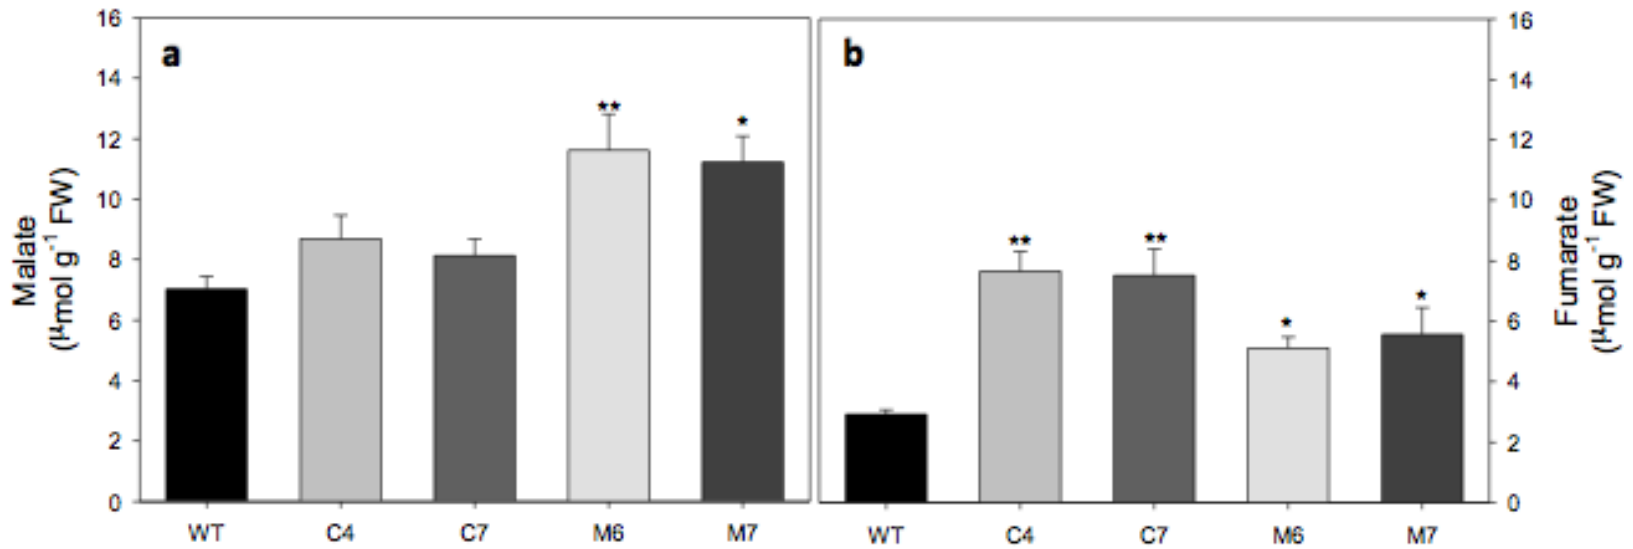

**Figure S4. Organic acids content in *HXK3* transgenic lines of *Arabidopsis thaliana* plant growing under optimal condition. a Malate and b Fumarate content in *A. thaliana* leaves. Values are presented as means  $\pm$  SE (n = 5). Asterisks indicate that the values from lines were determined by Student's t test to be significantly different (\*\* (P<0.01) and \* (P<0.05)) from the wild-type .**

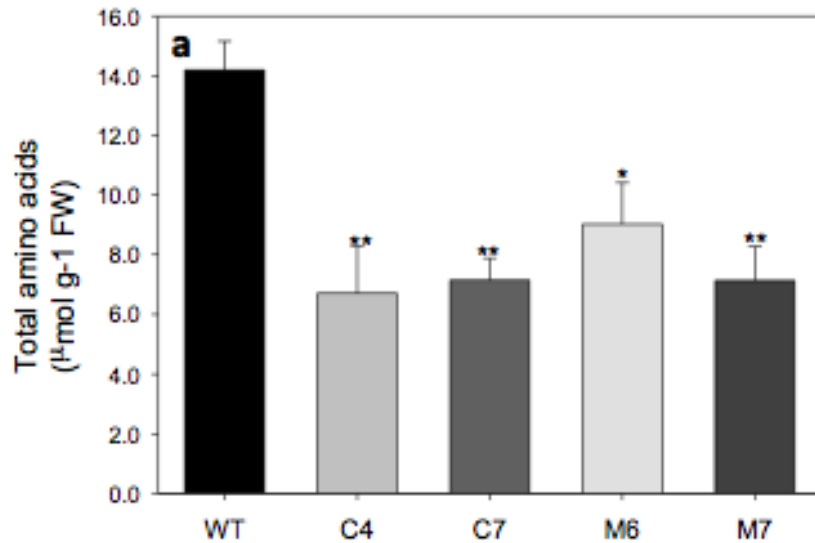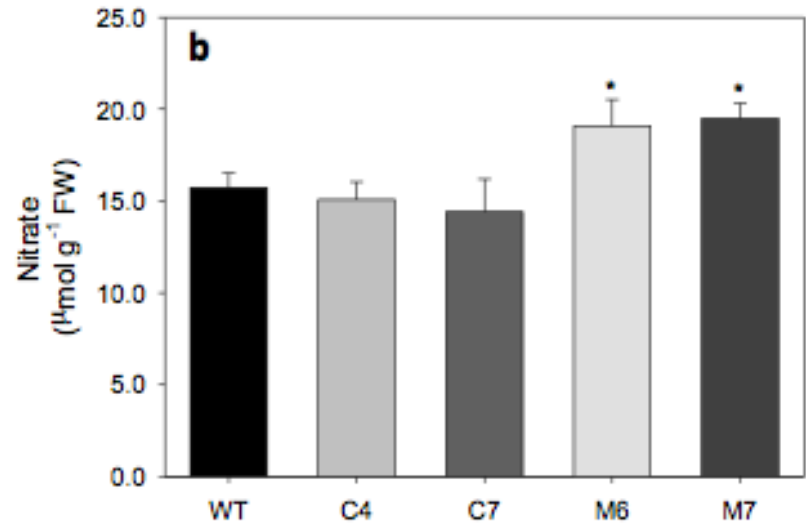

**Figure S5. Nitrogen compounds in *HXK3* transgenic lines of *Arabidopsis thaliana* plant growing under optimal condition. a** Total amino acids and **b** nitrate content in *A. thaliana* leaves. Values are presented as means  $\pm$  SE (n = 5). Asterisks indicate that the values from lines were determined by Student's t test to be significantly different (\*\* (P<0.01) and \* (P<0.05)) from the wild-type.

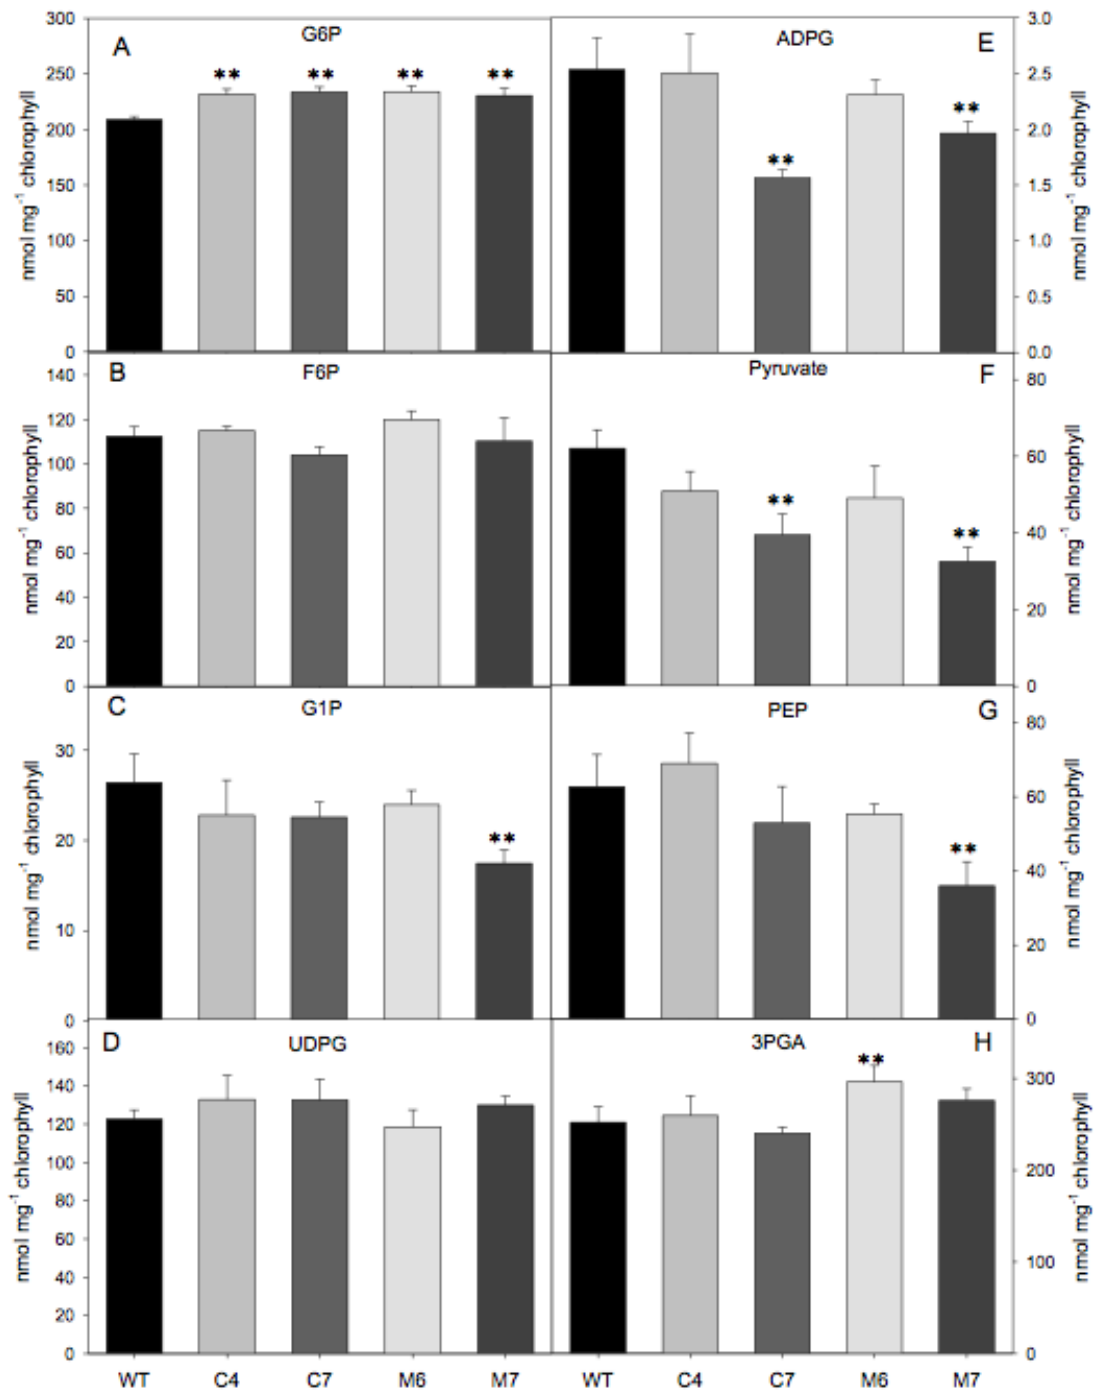

**Figure S6. Phosphorylated metabolites and glycolytic intermediates content in *HXK3* transgenic lines of *Arabidopsis thaliana* plant growing under optimal condition. a** Glucose-6-phosphate, **b** Fructose-6-phosphate, **c** Glucose-1-phosphate, **d** UDP-glucose, **e** ADP-glucose, **f** Pyruvate, **g** Phosphoenolpyruvate and **h** 3-phosphoglycerate content in *A. thaliana* leaves. Values are presented as means  $\pm$  SE ( $n = 5$ ). Asterisks indicate that the values from lines were determined by Student's t test to be significantly different (\*\* ( $P < 0.01$ ) and \* ( $P < 0.05$ )) from the wild-type
