# Supplementary material for: Prunus Hexokinase 3 genes alter primary C-metabolism and promote drought and salt stress tolerance in Arabidopsis transgenic plants
Source: PubMed Central journal article supplement (PMC8007757; doi:10.1038/s41598-021-86535-1), 2021-03-29
Supplement: 41598_2021_86535_MOESM3_ESM.pdf [file 41598_2021_86535_MOESM3_ESM.pdf]

**Title:**

***Prunus Hexokinase 3* genes alter primary C-metabolism and promote drought and salt stress tolerance in Arabidopsis transgenic plants**

**Jorge Pérez-Díaz<sup>1</sup>, Willian Batista-Silva<sup>2</sup>, Rubén Almada<sup>3</sup>, David B. Medeiros<sup>2</sup>, Stéphanie Arrivault<sup>4</sup>, Francisco Correa<sup>1</sup>, Adriana Bastías<sup>5</sup>, Pamela Rojas<sup>1</sup>, María Francisca Beltrán<sup>1</sup>, María Francisca Pozo<sup>1</sup>, Wagner L. Araújo<sup>2</sup> and Boris Sagredo<sup>1</sup>.**

<sup>1</sup>Instituto de Investigaciones Agropecuarias CRI Rayentué, Av. Salamanca s/n, Sector Los Choapinos, Rengo, Chile

<sup>2</sup>Max Planck Partner Group at the Departamento de Biologia Vegetal, Universidade Federal de Viçosa, 36570-900, Viçosa-MG, Brazil

<sup>3</sup>Centro de Estudios Avanzados en Fruticultura, CEAF, Camino Las Parcelas 882, Sector Los Choapinos, Rengo, Chile

<sup>4</sup>Max Planck Institute of Molecular Plant Physiology, Am Mühlenberg 1, D-14476 Potsdam-Golm, Germany

<sup>5</sup>Universidad Autónoma de Chile. Av. Pedro de Valdivia 425, Providencia, Santiago, Chile

>AT2G19860.1

MGKVAVATTVVCSVAVCAAAALIVRRRMKSAGKWARVIEILKAFEEDCATPIAKLRQVAD  
AMTVEMHAGLASEGGSKLKMLISYVDNLPSGDETGFFYALDLGGTNFRVMRVLLGGKHDR  
VVKREFKEESIPPHLMTGKSHELDFDFIVDVLAKFVATEGEDFHLPPGRQRELGFTFSFPV  
KQLSLSSGTLINWTKGFSIDDTVDKDVVGELVKAMERVGLDMLVAALVNDTIGTLAGGRY  
TNPDVVVAVILGTGTNAAYVERAHAI PKWHGLLPKSGEMVINMEWGNFRSSHLPLETEYDH  
SLDVSLSNPGEQILEKIIISGMYLGEILRRVLLKMAEAAFFGDIVPPKLIKIPFIIRTPNM  
SAMHSDTSPDLKVVGSKLKDILEVQTSLLKMRKVVISLCNIIASRGARLSAAGIYGILKK  
IGRDKTKDGEAQKSVIAMDGGLFEHYTQFSESMKSSLKELLGDEVSESEVEVILSNDGSGV  
GAALLAASHSQYLELEDDSETS\*

>AT2G19860.2

MRVLLGGKHDRVVKREFKEESIPPHLMTGKSHELDFDFIVDVLAKFVATEGEDFHLPPGRQ  
RELGFTFSFPVKQLSLSSGTLINWTKGFSIDDTVDKDVVGELVKAMERVGLDMLVAALVN  
DTIGTLAGGRYTNPDVVVAVILGTGTNAAYVERAHAI PKWHGLLPKSGEMVINMEWGNFR  
SSHLPLETEYDHSLDVDSLSNPGEQILEKIIISGMYLGEILRRVLLKMAEAAFFGDIVPPK  
LIKIPFIIRTPNMSAMHSDTSPDLKVVGSKLKDILEVQTSLLKMRKVVISLCNIIASRGAR  
LSAAGIYGILKKIGRDKTKDGEAQKSVIAMDGGLFEHYTQFSESMKSSLKELLGDEVSESE  
VEVILSNDGSGVGAALLAASHSQYLELEDDSETS\*

>AT4G29130.1

MGKVAVGATVVCTAAVCAVAVLVVRRMQSSGKWGRVLAAILKAFEEDCATPISKLRQVAD  
AMTVEMHAGLASDGGSKLKMLISYVDNLPSGDEKGLFYALDLGGTNFRVMRVLLGGKQER  
VVKQEFEEVSIIPPHLMTGGSDELNFIAEALAKFVATECEDFHLPEGRQRELGFTFSFPV  
KQTSLSGSLIKWTKGFSIEEAVGQDVVGALNKALERVGLDMRIAALVNDTVGTLAGGRY  
YNPDVVAAVILGTGTNAAYVERATAI PKWHGLLPKSGEMVINMEWGNFRSSHLPLETEFDH  
TLDFESLNPGEQILEKIIISGMYLGEILRRVLLKMAEDAFAFFGDTVPKLRIPFIIRTPHM  
SAMHNDTSPDLKIVGSKIKDILEVPTTSLKMRKVVISLCNIIATR GARLSAAGIYGILKK  
LGRD'TTKDEEVQKSVIAMDGGLFEHYTQFSECMESSLKELLGDEASGSVEVTHSNDGSGI  
GAALLAASHSLYLEDS\*

>AT4G37840.1

MTRKEVVLAVTAATITAVAAGVLMGRWIRRKERRLKHTQRILRKFARECATPVSKLWAVA  
DALVADMTASLTAECGSLNMLVSFTGSLPSGDEKGVHYGVNLRGKELLLLRTGLGGNEE  
PISDVQKHEIPIPDVNLNGSFKELCDFISLELVKFLAMNPGGEAEVKNLGFRTLRSVEQ  
IGSHSISIIHRKSLANDDDEKVLKDLVNDMNESLETHGLKIRMNTALVDNTIGELAGGRY  
YHKDTVAAVSLGMGTNAAYIEQAQEI SRWKS AIREPQEI VVSTEWGDFRSCHLPITEFDA  
SLDAESLNPGRHIFEKMVSGRYLGEIVRRVLLKMSEESALFGDTLPPKLTIPYILWSPDM  
AAMHQDI SEERETVNKKLKEVFGIMDSTLAAREVVVEVCDVVAERAARLAGAGIVGMIKK  
LGRLEKKMSI VIVEGGLYDHYRVFRNYLHSSVWEMLGDELSDHVVIEHSHGGSAA GALFL  
AACGDGHQDSESK\*

>AT1G50460.1

MGKVAVAFAAVAVVAACSVAAMVGRRMKSRRKWRTVVEILKELEDDCDTPVGRRLRQVVD  
AMAVEMHAGLASEGGSKLKMLLTFVDDLPTGREKGTYYALHLGGTYFRILRVLLGDQRSY  
LDVQDVERHPIPSHLMNSTSEVLFNFLAFSLERFIEKEENGSDSQVRRRELAFTFSFPVK  
HTSISSGVLIKWTKGFEISEMVGQDIAECLQGALNRRGLDMHVAALVNDTVGALSLSGYYH  
DPDTVVAVVFGTGSNACYLERTDAI IKCQGLLTTSGSMVNMWGNFWSSHLPRTSYDID  
LDAESSNANDMGFEKMSGMYLGDIVRRVILRMSSESDIFGPISPVLSEPYVLR TNVSVA  
IHEDDTPELQEVARILKDIGVSDVPLKVRKLVVKICDVVTRRAGRLAAAGIAGILKKIGR  
DGS GGITSGRSRSEIQMQKRTVVAVEGGLYMN YTMFREYMEEALVEILGEEVSQYVVVKA  
MEDGSSIGSALLVASLQS\*

>AT1G47840.1

MSLMFSSPVVTPALGSFTFSRRPRSNYIVMSAVRSNSASTCPILTKFQKDCATPTPYLRN  
VANAIADDMRDGLAVEGGGDEMILTFVDALPSGNEEGLFYALDLGGTNFRVRSVQLGGK  
KERV LATESEQISISQKLMIGTSEELFGFIASKLANFVAKEKPGRFLLEGRKRELGFTF  
SFPVKQTSIDSGTLSKWTKGFKVSGMEGKNVVAACLNEAMEAHGLDMRVSALVNDGVGTLA  
GARYWDEDVMVGVILGTGTNACYVEQKHAIPKLRSKSSSGTTIINTEWGGFSKILPQTIF

DLEMDETSLNPGEHLYEKMISGMYLGEIVRRVLLHMCETSDLFGHFAPAKLSTPLALRTE  
HLCKMQEDNTDDLDRDVGSI LYDFLDVEANMNARRRVVEVCDTVVKRGGRLAGAGIVAILE  
KIEKDTKRMGSGKRTVVAMDGALYEKYPQYRQYMQDALVELLGHKLASHVAIKHTKDVSG  
LGAALLAATNSIY\*

>AT3G20040.1

MGKVLVMLTAAAVVACSVATVMVRRRMKGRRKWRRRVVGLLKDLEEACETPLGRLRQMVD  
AIAVEMQAGLVSEGGSKLKMLLTFVDDL PNGSETGTYYALHLGGSYFRI IKVHLGGQRSS  
LEVQDVERHSIPTSLMNSTSEVLFDLFLASSLQRFIEKEGNDFSLSQPLKRELAFTFSFPV  
KQTSISSGVLIKWTKGFAISEMAGEDIAECLQGALNKRGLDIRVAALVNDTVGALSFGHF  
HDPDTIAAVVFGTGSNACYLERTDAI IKCQNPRTTSGSMVVNMEWGNFWSRRLPRTSYDL  
ELDAESMNSNDMGFEKMI GMYLGDIVRRVILRMSQESDIFGPISILSTPFVLR TN SVS  
AMHEDDTSELQEVARILKDLGVSEVPMKVRKLVVKICDVTTRRAARLAAAGIAGILKKVG  
RDGSGGRRSDKQIMRRTVVAVEGGLYLNYRMFREYMDALRDI LGEDVAQHVVVKAMED  
GSSIGSALLLASSQSVQTI PSV\*

>Fve | XP\_004287480.1

MGKVAVGAAVVCAAVTCAAAALLVRRRLKSSRRWARAMAILKEFEKCDTPIGKLRQVAD  
AMTVEMHAGLASEGGSKLKMLISYVDNLPTGDEKGLFYALDLGGTNFRVLRVQLGGKEKR  
VIKQEFDEVSIPPHLMTGTSEGLFDFIAEALAKFVATEGEGFHPAPGRRLRELGFTFSFPV  
WQTSIASGTLIKWTKGFSIEDAVEQDVVAELTKSVEKIGLDMRV TALVNDTIGTLAGGRY  
HNPHVIAAVILGTGTNAAAYVERAHAI PKWHGLLPKSGEMVINMEWGNFRSSHLPHTEYDQ  
ALDAESLNPGEQIFEKIISGMYLGDIVRRVLLKMAEAAFFGDTVPHKLIKPFVLRTPDM  
SAMHHDSSPDLRVVGSKLKDI LEISNTSLKVRKAVVALCDIVATRGARLSAAGILGVLLK  
LGRDVTVKDGEKHKSVVALDGGLFEHYTEFRVCMESTLDEL LGDDVAEHI SVEHSNDGSGI  
GAALLAASHSHYLGVEDS

>Fve | XP\_004289383.1

MRKEVAAAAALTA AAAITAI AALVRRHRKRKEQQWKETQKILRK FARDCATPVPKLWQVA  
NAFVADMRSSLIASNGTNTSLNMLVSYVASLPSGDEEGMYGVNLRRTDFLLLCARLRGK  
NDPISDFHREEIHIPTNLLDGTGSTKELFGFIAVELGKFVEAHPNSEMKDRPAKNNKLGFI  
IISCPVDQAVATSGTAITWKSFAADSTLGKKLVDHFNRALEE HGVKLSVYAMVDDTVGTL  
AGGRYNNRESVAAITLGMGTDAAYVEPADAALQWHGSPKLGEMVISTQWGEFSTPHLP  
TIFDTC LDAESSNPGFRRFEKVVSGMYLGEVRRVLLKMAKETALFGQC VVPSKLMTPYQ  
LSSPDMAAMHQDTS DNREVVEKLEKVEFGITKSTPEVREVVAEVC DIVAERGARLAGAGI  
LGI IKKLGRIENKRSIVTVEGGLYEHYRVFRNYLNSGVWEM LGDNHSDNVVIENSHGGSG  
TGALYLAASQMKDIDQS QMQSDPDVEAKPEPEPEPEF

>Fve | XP\_004291365.1

MSVTAATSPSVGSFHL CRRSTRPAGLPRFRMTVRSTAVSVTPLVTKLRKECATPLPLLRH  
VADAMAADMRAGLAGDGGSDLKMILSYVDSLPTGNEKGLFYALDLGGTNFRVLRVQLGGK  
EERVIA TEFDQVSI PKDLMFGTSEELDFDIASGLAKFAENEGNKFHLPAGTKREIGFTFS  
FPVKQTSVDSGILIKWTKGFSVSGTAGRDVVAACLNEAMERLGLDMRV SALVNDTVGTLAG  
ARYWDDDDVMVAVILGTGTNACYVERVDAVPKLQNHASSSGSTIINTEWGA FSNGLPLTEF  
DRDMAASINPGEQIFEKTI SGMYLGEIVRRVLLKMAEADALFGDP ILEKLSTPFALRTP  
DVCAMQQDTSDDLQDVGSI LYNVAGVESNLSARKI VVEVCDTIVKRGGRLAGAGIVGILQ  
KMEEDSKGVI FGKRTVVAMDGGLYENYPQYR TYLSEAVTELLGDDIAKNVVI EHSKDGSG  
IGAALLAANSKYL

>Fve | XP\_004302852.1

MGKKAVMIVCGAAVVTVA AAVLVRQMRCCGEWSKATAIVKELEEKCGTPIAKLRQVADA  
MTVEMHAGLASEGGSKLKMIISYVDNLPTGNEKGLFYALDLGGTNFRVLRVQLGGKGRGL  
VNQEFTEVSIPEGLMVGTTETLDFDIATELAKFVGKEGPEYQLPPGRQRELGFTFSFPVQ  
QTSINSGTLIKWTKGFSIDDTVGRDVVAELSKAIEKQGLDMRV SALVNDTVGTLAGGIYN  
NNDVVAAVILGTGTNAAAYVERAQAI PKWHGLLPKSGDMVINMEWGNFRSAHLPLTDYDHS  
LDTESLNP GDQIFEKIISGMYLGEIVRRALYRIAE EASIFGDIVPPKLVKVPFILRTPDMS  
AMHHDTSYDLKVV RDILKNVLEISNTSLKVRKLI VELCNTVATRGARLAAAGILGVLLK  
GRDVFRDGEKQKKTVIALDGGLFEHYTEYSKCMEN TLRELLGEEVGASIVIEHSNDGSGI  
GAALIAASHSQYLQDDES

>Mdo | NP\_001280783.1

MGKKAVIIVTATAVCAAAAVLVVRHRMRSSGRWARASAI I KELEEKCGTPTEKLRQVADA  
MAVEMHAGLASEGGSKLKVI I SYVDNLPTGNEKGLFYALDLGGTNFRVLRVRLGGKGRGI  
VSQEFIEVSI PENLMVGTSDALFDYIAAELAKFVAKEGQDHQPPPGRQRELGFTFSFPVL  
QSSINSGTLLKWKTFGSIDDAVGQDVVAALSKAIERTGLDMCVSALVNDTIGTLAGGRYI  
NQDVVAAVILGTGTNAAYVERAQAI PKWHGLLPKSGEMVINMEWGNFKSAHLPLTEYDHS  
LDTESLNPGDQIFEKI I SGMYLGEIVRRVLCRIAEAEASLFGDTI PPKLKVPFNLRTPDMS  
AMHQDASSDLRVVREKLNKLVLEI SNTSLKVRKVI VELCNIVATRGARLAAAGVLGVLKKL  
GRDAVKDGENKKTVVALDGGLYEHYTEYSKCMENLRELLGEEVAETVVI EHSNDGSGIG  
AALLAASHSQYPGIDES

>Mdo | NP\_001315646.1

MGKVAVGAAVVCAAAVCAAAALIVRHRMKSSGRWARAMAILRELEDKCGTPIGKLRQVAD  
AMTVEMHAGLASEGGSKLKMLI SYVDNLPTGDENGLFYALDLGGTNFRVLRVRLGGNEKR  
VVKQEFDEVSI PPHLMTGTSEGLFDFIAEALAKFVATEGEGHLPAPSRQRELGFTFSFPV  
WQTSIASGTLIRWTKGFNI EDAVEQDVVVELTKSMEKIGLDMRVLTALVNDTIGTLAGGRY  
HNQDVIAAVILGTGTNAAYVERAHAI PKWHGLLPKSGEMVINMEWGNFRSSHLPLTEYDQ  
ALDAESLNPGEQIFEKI I SGMYLGEIVRRVLLKMAEEADFFGDVVPKLIKPFILRTPEM  
SAIHHDSSPDLKVVGSKLKDILEI SNTSLKMRKVAVAVCDIVATRAARLSAAGMLGVLLK  
LGRDVTVKDGEKQKSMIAMDGGLYEHYTEFRTSMECTLKELLGDEVAEHI SVEHSNDGSGI  
GAALLAASHSQYLEVEES

>Mdo | XP\_008342598.2

MRKKVAVVASVIVTTTVAASVLLRQWKRKKQRQWRETQKILRKFARDCATVPVKLWQVS  
NALVSDMKACLASGGTITTLNMLVSYVAALPTGDEEGFYGVNLRGTNFLILCARLGGKN  
NPISDLNREEIPIPSNLMAATAKELDFDIAVELGRFVSEHPNTSAKEMSKLGCIVSCPVE  
QSVVSDGTAIKWKSFSADSKVGGKLVSDFNKALEEHGVKLRVYAMVDDTVGNLAGGRYYN  
RESVAAVTLAMGTDAAYVEPANAALQWHGPPSKLGDVISTQWGFSSPHLPITIFDTC  
DAESPNPGCRRFEKLI SGMYLGEIVRRVLLKMAQETALFGDTVPSKLMTRYQLSSPDMAA  
MHQDTS EDHEI VGEKLLKVFGITSTSPRAREVVSEVCDIVAERGARLAGAGILGI I KKL  
RIENKKS SVTVEGGIYEHYRFRNYLNSVWEMLGNDLSDNVVIEHSHGGSGTGALFLAA  
SQMEMQNDPDPDHPDTPDGNDDDEPDIDDPHGNDDHHRGNDVRDPNPDT

>Mdo | XP\_008363245.2

MGKVAVGLAVGVAAACAVATMVVGRRI RSRKRWGRVFGVLKDLELSCETT VGRRLRQVVD  
AMAVEMHAGLASDGGSKLKMLLTFVDKLPDGSEKGTYYALDLGGTNFRVLRVRLGGTRSS  
TLEHDVHQDIPQNLMTGTSEVLFDFI ASSVKEFVERETDSDKLSLDRRRELGFMF SFPV  
KQTSVSSGTLKWKTFGFAIEDMIGKEVAGCLEKAMTKKGLNMSVAALVNDVSGTSLGHY  
HDTDTVAAVI IGTGTNACYLERTDAI IKSQGLLTASGGMVNMEWGNFWSSHLPRTVYDT  
ELDADSPNPNDQGF EKLI SGMYLGDVRRVIVRMSQESE IFEPIS SKLYMPFILRTPLIA  
AMHEDDSPDLEEVGRILRENLEIPDVPLKVRKLI VKVCDVTRRAARLAAAGIVGILKKI  
GRDGS GGITGGRSRSDHRMRRTVVAMEGGLYTEYTMFREYLHEALTEILGEDIAKHVVLI  
KVTE DGSATGAALLAASHSSYPVDNRLP

>Mdo | XP\_008365574.2

MKKEVVVATMTAAATVVVAAVLLRQWKRKKQRQWRETQKILRKFARDCSTVPVKLWQVS  
NALVSDMKACLASGGTITTLNMLVSYV SPLPTGDEKGFYGVNLRGTNFLILCARLGGKN  
NPISDLHKEEIP I PSNLMAATSKELDFDIAVELGKFVSEHPNTLAEELSKLGCIVSCPVE  
QSVVSDGTAIKWKSFSADSKVGGKLVSDFNKALEEHGVKLRVYAMVDDTVGNLAGGRYYN  
RESVAAVTLAMGTDAAYVEPANAALQWHGPPSKLGDVISTQWGGFSSPHLPITIFDTC  
DAESPNPGCRRFEKLI SGMYLGEIVRRVLLKMAQETAVFGDTVPLKLMTPYQLSSPDMAA  
MHQDTS EDHKIVGEKLLKVFGITSTSPKAREVVSEVCDIVAERGARLSGAGILGI I KKL  
RIENKKS SVTVEGGLYDHYRFRNYLNSVWEMLGNDLSDNVVIKHS HGGSGTGALFLAA  
SQMQMQNDPDPDPEPGNDDDEEPDIDDAHPDNDHDEHGNDVRDPNLN

>Mdo | XP\_008385759.2

MGKVAVGLAVGVAAACAVATVVVGRRI RCRKWSRVVGVKDL EHSCETTVGRRLRQVVD  
AMAVEMHAGLASDGGSKLKMLLTFVDKLPNGTEKGTYYALDLGGTNFRVLRVRLGGTRSS  
TLEHDVYRQAI PQDLMTGTSEDLDFI ASSLKEFVERERDVSKLSLDRRRELGFTFSFPV

KQISVSSGTLKWKGF AIEDMVGREIAGCLEKAMTRKGLNMRVAALVND SVGTLSLGHY  
HDTDTVA AVI IGTGTNACYLERIDAI IKSQGLLTASGSMVVNMEWGNFWS SHLPRTVYDI  
ELDADSPNPNDQGF EKLI SGM YLGDV VRRVIVRMSQESDI FEP I SSKLSMPFILRTPLIA  
AMHEDDTPDLEE VGSILRDNLEIPDVPLKVRKLI VKVCDVVT RRAARLAAAGIVGILKKI  
GRDGS GGITGGRSRSDHRMRRTV VAMEGGLYTGYTMFREYLHEALTEILGEDIAQHVV LK  
VTEDGSAMGAALLAAAYSSYPLDSVQLQ

>Mdo | XP\_008387327.2

MGKVAVGAAVVC AA AVCAAALVVRHRMKSSGRWARAMA ILKEFEDKCGTPIGKLRQVAD  
AMTVEMHAGLASEGGSKLKMLISYVDNLPTGDEKGLFYALDLGGTNFRVLRVQLGGKDKH  
VVKQESSEEVSI PPHLMTGTSEGLFDFIAETIAKFVATEGEG LHPAPGRQRELGFTFSFPV  
RQTSIASGTLIKWTKGFSIEDAVEQDVV GELTKSVEKIGL DLRVTALVNDTIGTLAGGRY  
HNQDVIAAVILGTGTNAA YVERAHAI PKWHG LLLPKSGEMVINMEWGNFRSSHLPLTEYDQ  
ALDAESLNPGEQIFEKIISGM YLGDIVRRVLLKMAEEADFFGDV VPPKLIKIPFVLRTPVM  
SAMHHDSSPDLKVVG NKLKDILEISNTSLKMRVVVALCDIVSTRGARLSAAGILGV LKK  
LGRDVTVKDGEKQKSVVALDGGLYEHYTEFR TSMEGTLKELLGDEVAEHISIELSSDGS GI  
GAALLAASHSQYLEVEES

>Mdo | XP\_008387435.2

MGKKAVIIVTATAVCAA AVLVVRHRMRSSGRWARASAI I KELEEKCGTPTGKLRQVADA  
MAVEMHAGLASEGGSKLKMIISYVDNLPTGNEKGLFYALDLGGTNFRVLRVQLGGKGRGI  
ISQEFTEVSIPENLMVGTSDALFDYIAAELAKFVAKEGQDYQLPPGRQRELGFTFSFPVL  
QSSINSGTLIKWTKGFSIDDAV GQDVVAELSKAIERTGLDMRVSALVNDTVGTLAGGRYV  
NQD VVVAVILGTGTNAA YVERAHAI PKWHG LLLPKSGEMVINMEWGNFKSAHLPLTEYDHS  
LDTESLNRGDQIFEKIISGM YLGEIVRRVLCRIAE EASLFGDTVPPKLV PFI LRTPDMS  
AMHHDASSDLRVVREK LKNVLEISNTSLKVRKVI VELCNIVATRGARLAAAGVLGV LKKL  
GRDAVKDGENQKT VVALDGGLYEHYTEYSKCMEN TLRELLGEEVAETIVIEHSNDGSGIG  
AALLAASHSQYLGIDES

>Mdo | XP\_008387945.1

MSAATTSPAVRSFYLR RRSP TVAMP RCRMAVRSA AVSLSPL LTKLHND SATPLPLLRHVA  
DSMASDMRAGLARDGGS DLKMILSYVD SLPSGNEEGLFYALDLGGTNFRVLRVQLGGKDE  
RVIA TEFDQVSI PPELMCGTSEELFDFIASGLAKFAQKEGNKFHLPTG TKREIGFTFSFP  
VKQTSIDSGILIKWTKGFSVSGTAGRDVVA CLNEAMERKGLDMRVSALVNDTVGTLAGAR  
YWD DDVMVAVILGTGTNACYVERVDAIPK LQGQVSSSGRTIINTEWGAFSNG LPLTEFDR  
DMAASINPGEQIFEKIISGM YLGEIVRRV LVKMAEADALFGESVLEK LSTPFLLRTPYL  
CAMQQDASDDLQAVG SILYNVAGV ESSL SARKIVVDVCDTIVKRGGRLAGAGIVGILQKM  
EEDSKDLIFGKRTV VAMDGGLYENYPQYRRYLQEA VAELLGTEISK NVVIEHSKDGSGIG  
AALLAANSQYI

>Nta | XP\_016440775.1

MKKATVGA VVVGA AVTVAVGALIVRHRMRKSSKWARARA ILKEFEKCGT PDAK LKQVAD  
AMTVEMHAGLASEGGSKLKMLISYVDNLPTGDEEGVFYALDLGGTNFRVLRVQLGGKDG  
IVHQEFTEASIPPNLMVGTSEALFDYIAAELAKFVAEEEEKFHQPPGKQRELGFTFSFP  
MQTSINSGTLIRWTKGFSIDDTVGQDVVAELTKAMQRKGVDMRVSALVNDTVGTLAGGRF  
SNKDVSIAVILGTGTNAA YVERAQAI PKWHG LPLPKSGEMVINMEWGNFRSSHLPLTEYDH  
AMDTDSLNPGEQIFEKICSGMYLGEILRRV LLRMAEEAAIFGDEVPPK LKNQFILRTPEM  
SAMHHD TSSDLRVVGD KLDILEISNTSLKTRRLVVELCNIVATRGARLAAAGVLGIVKK  
MGRDTPRESGQEKIVVAMDGGLYEHYTEYRKCL ENTLVELLGEEMATSIVFEHANDGSGI  
GAALLAANSLSLYVEDKS

>Nta | XP\_016445349.1

MGKV VVGA AVVCTAAVCAA VLLMRHKMKNSGKWAKAMDILKEFEK CETPIGKLRQVAD  
AMTVEMHAGLASEGGSKLKMLISYVDNLPTGDETGLFYALDLGGTNFRV MRVQLGGKEKR  
IVKQEVKEVSI PKNV MAGSSSDALFDFIATALVKFVATEGDDFHLPPGRQRELGFTFSFP  
VKQLSIASGTLIKWTKGFSIDDAV GQDVVRELTKAMERVGLDVRVAALINDTVGTLAGGR  
YNNPDVIAAVILGTGTNAA YVERANTI PKWHG LLLPKSGDMVINMEWGNFRSSHLPVTEYD  
QSLDAESLNPGEQIYEKMI SGM YLGEILRRVLCRMAEEASFFDDYVPPK LKTPFILRTQD  
MSAMHHDKSADLKVVGDKLKDILEVPNSTWKM RKIIVELCDIITSRGARLSAAGIVGILK

KLGRDRTLKDG EKQRSVIAVDGALFEHYTKFRNCMEGTIKELLGDAENIVVKLSNDGSGV  
GAALLAASHSQYLGLKES

>Nta | XP\_016456945.1

MGR LGV GIAAGFAVAACIVAAAMVGKRVKRRRKWKMMVKVLEEELEESC GTPVGR LKQVVD  
AMAVEMHAGLASEGGSKLKMLLTYVDKLPNGREKGTYYALHLGGTNFRVLRVHLGDQRSA  
ILGQDIARQPI PQHLM TSTSEDLDFVASSLKNFIEKEDDGLEQPSRRRELGF TFSFPV  
KQTSVSSGILIKWTKGFAIEDMIGRDVSECLQQVIARKGQDVRVAALINDTVGTLALGHY  
NDEDTVA AVVIGTGTNACYLERADAI IKCQGLLTTSGSMVVNMEWGNFWSSHL PRTSYDV  
DLDVASPNPNDQGF EKMSGLYLGDIVRRVLLRMSQESDDFGPASSKLAVPFALRTP LMA  
AMHEDDSPDLSEVAKILGEVLELPDVPVKVRKLVVKVCDVITRRAARLAAAGIVGILKKI  
GRDGSGGIAGGKFRSDRPSRMRRTVVAIEGGLYTSYTLFREYLNEAMKEILGEEISSNVI  
LRVMEDGSGIGAALLAAANSASEVDRVQLQ

>Nta | XP\_016465016.1

MKKATVGA VVGVAAATVAVAAALIVRHRMRKSSKWARARAILKEFEKCGTPDAK LKQVAD  
AMTVEMHAGLASEGGSKLKMLISYVDNLPTGDEEGVFYALDLGGTNFRVLRVQLGGK DGG  
IVHQEFAEASIPPNLMVGTSEALFDYIAAELAKFVAEEEEERFHQPPGKQRELGF TFSFPI  
MQTSINSGTLIRWTKGFSIDDTVGQDVVAELTKAMQRKGI DMRVSALVNDTVGTLAGGRF  
SNKDVCIAVILGTGTNAAAYVERAQAI PKWHGPLPKSGEMVINMEWGNFRSSHLPLTEYDH  
AMDTDSLNPGEQIFEKICSGMYLGEILRRVLLRMAEEAGIFGDEVPPKLNQFILRTP EM  
SAMHHD TSSDLRVVGD KLKDI LEISNTSLKTRRLVVELCNIVATRGARLAAAGVLGIVKK  
MGRDTPRESGQEKIVVAMDGGLYEHYTEYRKLENTLVELLGEEMATSIVFEHANDGSGI  
GAALLAASNSLYVEDKS

>Nta | XP\_016465440.1

MGR LAVGI SAGFAVAACIVAAAMVGKRVKRRRKWKMMVKVLEEELEESC GTPVGR LKQVVD  
AMAVEMHAGLASEGGSKLKMLLTYVDKLPNGREKGTYYALHLGGTNFRVLRVHLGGQ RSA  
ILGQDI ERQPI PQHLM TSTSEDLDFVASSLKDFIEKEGNGL EQPSRRRELGF TFSFPV  
KQTSASSGILIKWTKGFSIEDMIGRDVSECLQQAIARKGQDVRVAALINDTVGTLALGHY  
NDEDTVA AVVIGTGTNACYLERADAI IKCQGLLTTSGMVVNMEWGNFWSSHL PRTSYDI  
DLDVASPNPNDQGF EKMSGLYLGDIVRRVLLRMSQESDDFGPASSKLAVPFALRTP LMA  
AMHEDDSPDLSEVARILGEVLELPDVPVKVRKLVVKVCDVITRRAARLAAAGIVGILKKI  
GRDGSGGIAGGKFRSDRPSRMRRTVVAIEGGLYTSYTLFREYLNEAMKEILGEEISSNVI  
LRVMEDGSGIGAALLAAANSASEVDRVQLH

>Nta | XP\_016468018.1

MSVTVSSPAGRSFHISRSPYKKISKPRVIAAVRSGVSLAVAPILTKLQKDCATPLPVL R  
HVADAMAVDMRAGLAVDGGSDLKMILSYIDTLPTGNEKGLFYALDLGGTNFRVLRVQLGG  
KEERVIA TEFEQVSI PQELMFATSEELDFDIFASELGKFSQSEGGKFEMQQGR TREIGFTF  
SFPVKQTSVKSGILIKWTKGFAVSGTAGKD VVAACLNEAMERQGLGMQVSALVNDTVATLA  
GARYWDNDVMVAVILGTGTNACYVERVDAIPKLPQRMSNSPETIVNTEWGA FSNGLPLTE  
FDREMDAESINPGEQIF EKTISGMYLGEIVRRV LVKMAKVGGLFGGGYVPEKLVTPFVLR  
TPDICAMQQDTSRDLEAVESVLYDIAGVKSDL SARKTVVDICDTIANRGGRLAGAGIVGI  
LQKMEEDSKGVI FGKRTVVAMDGGLYEHPQYREYLQEA VTELLGSEISKNVVIEH SKDG  
SGIGAALLAAANSKYEH DY

>Nta | XP\_016475909.1

MKKATVGA AVVIGAATVCAVAALIVNHRMRKSSKWARAMAILREFE KCGTPDAK LKQVAD  
AMTVEMHAGLASEGGSKLKMLITYVDNLPTGDEAGVFYALDLGGTNFRVLRVQLGGK DGG  
IVHQEFAEASIPPNLMVGTSEALFDYIAAELAKFVNEEGEK FQQPPGKQRELGF TFSFPV  
MQTSINSGTIMRWTKGFSIDDAVGQDVV GELAKAMKRKGVDMRVSALVNDTVGTLAGGKY  
THNDVAVAVILGTGTNAAAYVERVQAI PKWHGVPVPSGEMVINMEWGNFRSSHLPLTQYDH  
ALDTNSLNP GDQIF EKMTSGMYLGEILRRVLLRVAEEAGIFGDEVPPKLS PPFVLRTPDM  
SAMHHDASSDLRVVGD KLKDI LEISNTSLKTRRLVIELCNIVATRGARLAAAGVLGILKK  
MGRDTPRQGGLEKTVVAMDGGLYEHYTEYRTCLENTL KELLGDELATSIVFEHSNDGSGI  
GAALLAASNSMYLEDKS

>Nta | XP\_016487727.1

MKKATVGA AVVIGAATVCAVAALIVNHRMRKSSKWARAMAILREFE KCGTPDAK LKQVAD

AMTVEMHAGLASEGGSKLKMLITYVDNLPTGDEAGVFYALDLGGTNFRVLRVQLGGKDG  
IVHQEFAEASIPPNLMVGTSEALFDYIAAELAKFVAEEEEKFQQPPGKQRELGFTFSFPV  
MQTSINSGTMRWTKGFSIDDAVGQDVVVELTKAMKRKGVDMRVSALVNDTVGTLGGKY  
THNDVAVAVILGTGTNAAYVERVQAI PKWHGPVPSGEMVINMEWGNFRSSHLPLTQYDH  
ALDNTSLNPGDQIFEKMTSGMYLGEILRRVLLRVAEDAGIFGDEVPPKLSPPVLRTPDM  
SAMHHDISSDLRVVGDCLKDILEISNTSLKTRRLVVELCNIVATRGARLAAAGILGILKK  
MGRDTPRQGGPEKTVVAMDGGLYEHYTEYRTCLENTLKELLGDELATSIVFEHSNDGSGI  
GAALLAASNSMYLEDKS

>Nta | XP\_016490297.1

MKVVVGAAVVCTAAVCAAALLMRHKMKNSGKAWAKAMDILKEFEKCEP I GKL RQVAD  
AMTVEMHAGLASEGGSKLKMLISYVDNLPTGDETGLFYALDLGGTNFRVLRVQLGGKEKR  
IVKQEVKEVSI PKNVMAGSSSDALFDFIATALVKFVATEDDDFRLPPGRQRELGFTFSFP  
VKQLSIAAGTILIKWTKGFSIDDTVGQDVVRELTKAMERVGLDVRVAALVNDTVGTLGGY  
YNNPDVIAAVILGTGTNAAYVERANTI PKWHGLLPKSGDMVINMEWGNFRSSHLPVTEYD  
QSLDTESLNPGEQIYEKMSGMYLGEILRRVLCRMAEEASFFDDYVPPKLPKTPFILRTPD  
MSAMHHDKSADLVVGDCLKDILEVFNSTWKMRI IVELCDIITSRGARLSAAGIVGILK  
KLGRDRTLKDGKQRSVIAVDGALFEHYTKFRNCMEGTIKELLGDAAESIVIELSNDGSGI  
GAALLAASHSQYLGLEES

>Nta | XP\_016497279.1

MSVTVSSPAGRSFHI SRSHTKMVSKPRVIMAAVRSGVSLGVVPI LTKLQKDCATPLPVLR  
HVADAMAVDMRAGLAVDGGSDLKMLISYVDTLPTGNEKGLFYALDLGGTNFRVLRVQLGG  
KEERVIAFEFEQVSI PQELMFATSEELDFDIASELGKFSQSEGGKFEMQQGRTREIGFTF  
SFPVKQTSVKSGILIKWTKGFAVSGTAGKDVVAACLNEAMERRGLGMQVSALVNDTVATLA  
GARYWDNDVMVAVILGTGTNACYVERVDAIPKLPKRMSNSPVTIVNTEWGAFSNGLPLTE  
FDREMDAESINPGEQIFEKTI SGMYLGEIVRRVLVKMAKVGGLFGGGYVPEKLVTPFVLR  
TPDICAMQQDTSRDLEAVESVLYDIAGVKSDLNARKTVVDICDTIAKRGRLAGAGIVGI  
LQKMEEDSKSVVFGKRTVVAMDGGLYEHYPQYREYIQEAVTELLGSEISKNVVIEHSDKG  
SGIGAALLAANSKYEHYD

>Nta | XP\_016501284.1

MRKEVVVLAAVTTVSTVVAALLVRQWKRSEQRWRHAQRILRKFARECATPVPKLWQIA  
DDLVTMAGLTSSESSLQMLPSCLASLPTGDEKGLYYGINLRGTNFIIVQARLGGRN  
PVSRLAGRNEPISDLRQEQI QIPPNIEGSSQELFDWITVELGKFISMHSEGLQGGEKNV  
GFTVSPPTIAEVAASKETAIKWKDSLFGDAEGNKLLNEINLALAEKHGVKQVFALVDDTIG  
VLAGGRYYSKESVAAVTLGMGTNAVYVESAKSVEKWPDQAPKPEEIAINIKWGNFSSSHL  
PITEFDTSLDAESSYPGSQIFEKLI SGTYLGETVRRVLLKMAQESSLFGDRVPPKLAITY  
SLRSPDMAAMHQDTSSEYVIDEKLTEIFGITNSTTMARELVAEVCVVAERGARLVGAG  
IVGIVKKLGRLSNRISIIITVEGGVYEHYRVFRNYLHSSVWEMLGNELSDNVIIEHSHGGS  
GASSIFIAASQP

>Osa | XP\_015614778.1

MRKAAALASAAMAAA VAVVSTVLHQRRRAAKRSERAEAVLLRDLQERCAAPVELLRQV  
ADAMAAEMRAGLAAEGGSDLQMLVTVVDSLPSGGEKGMFYALDLGGTNFRVLRVQLGGKE  
RRIIKQDSEGISIPQHLMSSSSHELDFDVAVALAKFVASEGEDCHLPEGTQRELGFTFSF  
PVKQKSLASGTLIKWTKSFAIDEMVGKDVVAELNMAIRSQGLDMKVTALVNDTVGTLAAG  
RYVNHDITAAVILGTGSNAAYIDHADAI PKWHGSLPKSGNMVINMEWGNFKSSHLPLTEF  
DQELDAESLNPQKQVYEKSI SGMYMGELVRRILLKMAQETRIFGDNIPPKLERPYILRTL  
DMLIMHHDTSDDLRTVANKLKEVLGIEYTSFTTRKLVLDVCEAIATRGARLAAAGIYGI I  
QKLGQHS DSPSTRSVIAVDGGVYKYTFFSQCMESTLSDMLGQELAPSVMIKHVNDGSG  
VGAALLAASYSQYHQAESADSS

>Osa | XP\_015614785.1

MFYALDLGGTNFRVLRVQLGGKERRI IKQDSEGISIPQHLMSSSSHELDFDVAVALAKFV  
ASEGEDCHLPEGTQRELGFTFSFPVKQKSLASGTLIKWTKSFAIDEMVGKDVVAELNMAI  
RSQGLDMKVTALVNDTVGTLAAGRYVNHDITAAVILGTGSNAAYIDHADAI PKWHGSLPK  
SGNMVINMEWGNFKSSHLPLTEFDQELDAESLNPQKQVYEKSI SGMYMGELVRRILLKMA  
QETRIFGDNIPPKLERPYILRTL DMLIMHHDTSDDLRTVANKLKEVLGIEYTSFTTRKLV

LDVCEAIATRGARLAAAGIYGI IQKLGQHS DSPSTRRSVIAVDGGVYKYYTFFSQCMEST  
LSDMLGQELAPSVMIKHVNDGSGVGAALLAASYSQYHQAESADSS

>Osa | XP\_015618116.1

MGKGTVVGTAVVVCAAAAAVGVAVVVSRRRRSKREAEERRRRAAVIEEVEQRFSTPT  
ALLRGIADAMVEEMERGLRADPHAPLKMLISYVDNLPTGDEHGLFYALDLGGTNFRVIRV  
QLGGREKRVSQQYEEVAIPPHLMVGTSMELDFDIAAELESFVKTEGEDFHLPEGRQREL  
GFTFSFPVHQTSISSGTLIKWTKGFSINGTVGEDVVAELSRAMERQGLDMKV TALVNDTV  
GTLAGGRYVDNDVAAAVILGTGTNAAYVEHANAI PKWTGLLPRSGNMVINMEWGNFKSER  
LPRSDYDNALDFESLNPGEQIYEKMI SGMYLGEIVRRILLKLAHDASLFGDVVPTKLEQR  
FILRTPDMSAMHHDTS HDLKHGAKLKDILGVADTSLEARYITLHVCDLVAERGARLAAA  
GIYGILKKLGRDRVPSDGSQKQRTVIALDGGLYEHYKKFRTCLEATLADLLGEEAASSVV  
VKLANDGSGIGAALLAASHSQYASVE

>Osa | XP\_015621344.1

MGRVGLGVAVGCAAVTCAIAAALVARRASARARWRAVALLREFEEGCATPPARLRQVVD  
AMVVEMHAGLASDGGSKLKM LTFVDALPSGSEEGVYYSIDLGGTNFRVLRVQV GAGSVI  
VNQKVEQQPIPEELTKGTTEGLFN FVALALKNFLEGEDDQDGKMALGFTFSFPVRQISVS  
SGSLIRWTKGFSIRDTVGRDVAQCLNEALANGLNVRVTALVNDTVGTLALGHYYDEDTV  
AAVIGSGTNACYIERTDAIKCQGLLTNSGGMVVNMEWGNFWSSHLPRTPYDILLDDET  
HNRNDQGF EKMI SGMYLGEIARLVFHRMAQESDVF GDAADSLSNPFILSTPFLAAIREDD  
SPDLSEVRRILREHLKIPDAPLKTRRLVVKVCDIVTRRAARLAAAGIVGILKKLGRDGS  
AASSGRGRGQPRRTVVAIEGGLYQGYPVFREYLDEALVEILGEEVARNVTLRVTE DGSV  
GAALLAAVHSSNRQQGGPI

>Osa | XP\_015637554.1

MVAAAVAAAEQVVAALREECATPAARLDGVAAMAGEMAAGLAEEGGSKIKMIVSYVDNL  
PNGTEEGLFYALDLGGTNFRVLRVQLAGKEKRVVKRESREVSIPPHLMMSGNSSSELF GIA  
SALAKFVADEGHNAVFNDRQRELGFTFSFPVRQTSIASGTLIKWTKAFSIDDVAVGEDVVA  
ELQMAMEKQGLDMRV SALINDTVGTLAAGSYDDEDIVGVILGTGSNAAYLEKANAI PKL  
EGELPKSGNMVINTEWGNFSSSCLPITEYDEALDKESLNPGEQIFEKLI SGMYLGEIVRR  
VLLKISLQSSIFGNLDQTKL KTRFILRTPDISVMHHDGTPDLRIVA EK LADNLKITDTSL  
ETRMVVEICDIVTRRSARLAAAGIVGILRKIGRVPDGRKRSVIAIDGGLYEHYTEFRQ  
CLETTLTELLEGEASKSVAVKLANDGSGLGAALIAAAHSQYLN

>Osa | XP\_015637797.1

MRKAAA AVAAAAVGVALLVRRQLREAKRWGRADAVLRELEERCAAPPGR LRQVADAMA  
VEMHAGLASEGGSKLKM IISYVDALPSGEEKGVFYALDLGGTNFRVLRVQLGGKEGRVIK  
QEHDEISIPPHLMTGGSNELDFDIASSLAKFVASEGEDFH LAEGRQRELGFTFSFPVKQT  
SIASGTLINWTKGFSIDETVGEDVVT ELTKALERQGLDMKV TALINDTIGTLAGGRYDDN  
DVIAAVILGTGTNAAYVERANAI PKWHDL LPKSGDMVINMEWGNFRSSHLPLTEFDQALD  
AESLNPGEQVYEKLI SGMYLGEIVRRVLLKMAEEASLFGDEVPPK LKIPFIIRTPYMSMM  
HCDRSPDLRTVGAKLKDILGVQNTSLKTRRLVVDVCDIVAKRAHLAAAGI HGILKKLGR  
DVPNTDKQRTVIAVDGGLYEHYTIFAECVESTLRDMLGEDVSSTIVIKLAKDGS GIGAAL  
LAAHSQYREAEEL

>Osa | XP\_015639323.1

MGKAAAVGTAVVVAAAVGVAVVLARRRRRDLLELVEGAAAERKRKVAAVIEDVEHALSTP  
TALLRGISDAMVTEMERGLRGD SHAMVKMLITYVDNLPTGNEQGLFYALDLGGTNFRVLR  
VQLGGKEKRVVQQYEEVSI PPHLMVGTSMELDFDIASALS KFVDTEGDDFHLPEGRQRE  
LGFTFSFPVQS TSISSGTLIKWTKGFSINDAVGEDVVSELGKAMERQGLDMKIAALVNDT  
VGTLAGGRYADNSVVAAILGTGTNAAYVENANAI PKWTGLLPRSGNMVINTEWGSFKSD  
KLPLSEFDKAMDFESLNPGEQIYEKLI SGMYLGEIVRRILLKLAHDAALFGDVVPSKLEQ  
PFVLRTPDMSAMHHDSS HDLKT VGAKLKDIVGV P DTSLEVRYITSHICDIVAERAARLAA  
AGIYGV LKKLGRDKMPKDGSKMPRTVIALDGGLYEHYKKFSSCLESTLTDLLGDDVSSSV  
VTKLANDGSGIGAALLAASHSQYAEID

>Osa | XP\_015645316.1

MSAAAIA SPIPAIAIVVQQRRGRSRGGGSGAAAVRCSAVAP T SAIAPILADLR LRC AA  
PLPVLRRVADAMASGM RAGLADDGAGELKMI PSHVYSLPTGNETGLFYALDLGGTNFRVL



RVQLGGKDKRIIDTEFEQVSI PREIMHGITEDLFD FIASGLSRFVATEGDKFHL PQGRKR  
ELGFTFSFPVNQTSIDSGILIKWTKGFVAVSGTAGKDVVACLNAAMERQGLDMRVSALVND  
TVGTLGARYWDDDDVMVAVILGTGTNACYIQRTEAIPKLQHLKLETGNTIINTEWGAFSD  
GLPLTEFDREMDDESINPGEQIFEKTI SGMYLGEIVRRVLVKMAEVSDLFGHSFPKKLAE  
PFVLRTPHLCAMQQDTSNDLGEVESILSDVIGVVSQASLLARRVTVEVSDCI IRRGGRLAG  
AGIVGILEKMENDSRGHIFGRRTVVAMDGGLYEKYPQYRRYMKEAVAELLGPERSNRIAI  
EHTKDGSGIGAALLAAANSKYAAAQISTR

>Ppa | XP\_024359760.1

MGQSKVLVGVYIACAAAACATAAVAVTQRLKVRAQKCTARKILVEFQEACETPLPRLRQV  
VDAMAVEMHAGLVSEGGSKLKMLPTFIDRLPNGSEKGLYYAVDLGGTNFRVLRVQLGGLE  
GRVIKQEYEEVAIPPELMLGTSEQLFHFIAKELAGFVAREGEEFRLGDGQSREIGFTFSF  
PCKQTAVNSGTLQWTKGFKVND AIGQDVVAALQKCIERLGCKMRIAALVNDTVGTLAGG  
RYWNNVMIAVILGTGTNACYVERAESISKWTGELPKSGQMVINMEWGNFWSSHLPRTYV  
DELLDSESLHPGEYGF EKMI SGMYLGD CVRRVLVRMAQEAGIFGPHVPHTLLESFSLQTP  
EMSRMHDDSSDLKVVAEVLKRLYGIQNTTVGIRKIVVAVCDTTCQRGARLAAAGIVGIL  
KKIGRDGSTANGLMRRNDTNGIHDELSVNSTPGSGKTVVAMDGGLYEHYSKFRNYMQEAV  
RELLGDASKNVSIELSKDGSGIGAALLAASYAEYVPS

>Ppa | XP\_024360110.1

MADAFKARYSSGAQIRTKIRSAACAAA AVIVSRRLKVR SQKCTARKILLEFQEACYTP  
LARLRQVVDAMAVEMHAGLVSEGGSKLKMLPTYIDRLPDGHERGLYYAVDLGGTNFRVLR  
VQLGGLEGRVIKQEYEEVAIPPELMLGTSEQLFDFIAKELVSFVAREGQDFRLHAGQNRE  
IGFTFSFPVKQTAVNSGTLQWTKGFKVND AIGQDVVAALQ RGIERRGYKMRIAALVNDT  
VGTLAGGRYWNNVMI G VILGTGTNACYVERAEAVSKWAGDIPKSGEMVINMEWGNFWSS  
HLPRTYVDESLDNESLNPGEYGF EKMI SGMYLGD CVRRVLVRMAQEACIFGTPVPHKLLE  
AFSLMTPDMSKMHDDSSDLKVVAEVLKRVYGIQNTTVGIRKIVVAVCDTVCQRGARLAA  
AGIVGILKKIGRDGSAANGVIKRNTFEQSDMNGFHDEVPVHYTSGGRTVVAMDGGLYEHY  
TKFRNYMQEAVVELLGE GSKNVVIELSKDGSGIGAALLAASHAEYVIS

>Ppa | XP\_024401777.1

MGQSKAMAGVYIACAAAACAAA AVVLTQRVKVRSQKYTARKILVEFQEACETPLPRLRQV  
VDAMAVEMHAGLVSEGGSKLKMLPTFIDHLPDGNKGLYYAVDLGGTNFRVLRVQLGGLE  
GRVIKQEYEEVAIPPELMLGTSEQLFDFIAKELVSFVAREGEDFRLHEGQSREIGFTFSF  
PCKQTAVNSGTLQWTKGFKVND AIGQDVVAALQ GSIERRGYKMRIAALVNDTVGTLAGG  
RYWNNVMIAVILGTGTNACYVERAESISKWGELPKSGQMVINMEWGNFWSSHLPRTYV  
DELLDNESLNPGEYGF EKMI SGMYLGD CVRRVLVRMAQQAGIFGPHVPHKLLEAFTLQTP  
DMSKMHDDSSDLK MVAEVLKTVYGIHNTTLGIRKIVLAVCDIVCQRGARLAAAGIVGIL  
KKIGRDGSTANGFIRRNDVNGIHDELTVNSIGGSGKTVVAMDGGLYEHYSKFRNYMQQAV  
RELLGDAAKNVFIELSKDGSGIGAAILAASHAEYVPT

>Par | CAB4265578.1

MSVAATSPAVGSFYLRRRSPSTAMSMPRFRMAVRSAAVSVTPLLTKLHNSATPLPLLRH  
VAEAMAADMRAGLAVEGGSDLKMILSYVDLSLPSGNEEGLFYALDLGGTNFRVLRVQLGGK  
QERVIAEFDQVSI PKELMFGTSEQLFDFIASGLAKFAQKEGNKFHLPTGKREIGFTFS  
FPVKQTSIDSGILIKWTKGF SVSGTAGKDVVACLNEAMERQGLDMRVSALVNDVAVGTLAG  
ARYWDDDDVMVAVILGTGTNACYVERADAI PKLQGVSSSGRTIINTEWGAFSDGLPLTEF  
DREMDAASINPGEQIFEKTI SGMYLGEIVRRVLVKMAEADALFGESVPEKLSTPFALRTP  
DICAMQQDISDDLQDVGSILYNVAGVESNLSARKIVVDVCDTIVKRGRLAGAGIVGILQ  
KMEEDSKGLIFGKRTVVAMDGGLYANYPQYRRYLQEA VTELLGTEISKNVVIELTKDGSG  
IGAALLAAANSQYA

>Par | CAB4272496.1

MGKKAVVIITAAAVCAAAAALVVRHHRSSGRWARATAI I KELEEKCGTPIGKLRQVADA  
MAVEMHAGLASEGGSKLKMIISYVDNLPTGTEKGLFYALDLGGTNFRVLRVQLGGKGRGI  
ISQEFTEVSIPEHLMVGTSDALFDYIAAELAKFVAKEGQDYQLPPGRQRELGFTFSFPVL  
QSSINSGTLIKWTKGFSIDDAVGQDVVAELS KAI EKQGLDMRVSALVNDTVGTLAGGRYV  
NGDVVAAVILGTGTNAA YVERAHAI PKWHGLLPKSGDMVINMEWGSFKSAHLPLTEYDHS  
LDTESLNPGDQIFEKLI SGMYLGEIVRRVLCKIAEEASLFGDTVPPKLKVPFILRTPDMS

AMHHDTSSDLKVVVDILKNVLEISNTSLKVRKVVVELCNIIVATRGARLAAAGIVGVLKKV  
GKDAFKDGEKQRTVVVALDGGLYEHYNEYSKCMENLRELLGEEVSESVVIEHSNDGSGIG  
AALLAASHSQYLGVDDES

>Par | CAB4278350.1

MGKVAVGLAVGVAVAACAVATVVVGRIRSRKWRVVGVLKELEQSCETTGRRLRQVVD  
AMAVEMHAGLASDGGSKLKMLLTFVDKLPNGSEKGTYYALDLGGTNFRVLRVKLEGTRSS  
TLEHDVYRQAIPQDLMTGSSSEDLDFDIFASSLKEFVEREGDISELSLDRRRELGFSTFSFPV  
KQMSVSSGTLKWKTKGFSIEDMVGREIAECLLENAMTRKGLNMRVAALVNDSVGSALGHY  
HDTDTVAAVIIGTGTNACYLERTDAI IKSQGLLTTSGMVVNMEWGNFWSSHLPRTLYDI  
ELDADSPNPNDQGFELISGMYLGDVVRVIVRMSQESDIFDPISSKLSMPFILRTPLIA  
AMHEDDSPDLEEVRRIILRDNLEIPDVPLKVRKLIIVKVCVTRRAARLAAAGIVGILKKI  
GRDGSGGIAGGRSRSDQKMRRTVVAMEGGLYTGVTMFRDYLHEALTEILGEDIAQHVIK  
VTEDGSAMGAALLAASNSSYPVDSVQLL

>Par | CAB4283983.1

MRKEVVVAAALTATATVVVAAALLRQWKRKKQRQWRETQKILRKFARDCATPVPKLWLV  
NALVSDIKACLASSGITITLNMVSYVAPLPSGDEEGLYGVNLRGTNFIILCARLGKKN  
KPIISDLYREEIPIPSNLMAATSKELDFDFAVELGKFISEHPDGQADSAEGNKLGCIVSCP  
VDQAVVSHGTAIKWKSFSADSKVGGKLVSDFNQALEEHGVNLRVYAMVDDTVGNLAGGRY  
YNKESVAAVTLAMGTDAAYVEPADAALQWHGSPKLGEMVISTQWGFSSPHLPITIFDT  
CLDAESSNPGRRRFEKLIISGMYLGEIVRRVLLKMAQETALFGDHVPSKLMTPYQLSSPDM  
AAMHQDASDDREIVGEKLTKEVFGITSTSPRVREVVSEVCDITAERGARLAGAGILGIKK  
LGRINENKKSVVTEGGLYEHYRVFRNYLNSVWEMLGNDLSDNVVIEHSHGGSGTGALFL  
AASQMDMQNDEPDNDNDPDSNDNDHDHDPDLADT

>Par | CAB4288362.1

MGKVAVGAAVCAAAVCAAAAALVVRHRMKSSGRWARAMAILREFEDKCGTPIGKLRQVAD  
AMTVEMHAGLASEGGSKLKMLISYVDNLPTGDEQGLFYALDLGGTNFRVIRVQLGGKEKR  
VVKQEFDEVSIPPNLMTGTSEALDFDFAEALAKFVATEGEGFHPAPGRQRELGFSTFSFPV  
WQTSIASGTLIKWTKGFNIEDAVEQDVVVELTKSVEKIGLDMRVTALVNDTIGTLAGGRY  
HNQDVIAAVILGTGTNAAAYVERAHAI PKWHGLLPKSGEMVINMEWGNFRSSHLPLTEYDQ  
ALDAESLNPGDQIFEKIISGMYLGDIVRRVLCKMAEEASFFGDVPPKLVKVPFILRTPDM  
SAMHHDTSPDLRVVGSGLKDILEISNTSLKMRKVVVALCDIVATRGARLSAAGIMVLLK  
LGRDVTKEGEKQKSVVALDGGLYEHYTEFRSTSMESTLKELLGDEVAEHSVEHSNDGSGI  
GAALLAASHSQYLEVEES

>Pav | XP\_021800069.1

MGKKAVVIITAAAVCAAAAALVVRHRMRSSGRWARATAI I KELEEKCGTPIGKLRQVADA  
MAVEMHAGLASEGGSKLKMIISYVDNLPTGTEKGLFYALDLGGTNFRVMRVQLGGKGRGI  
ISQEFTEVSIIPENLMVGTSYALFDYIAAELAKFVATEGEGFHPAPGRQRELGFSTFSFPV  
QSSINSGLTIKWKTKGFSIDDAVQDVVAELSIAIEKQGLDMRVLSALVNDTVGTLAGGRYV  
NGDVVAAVILGTGTNAAAYVERAHAI PKWHGLLPKSGDMVINMEWGNFKSAHLPLTEYDHS  
LDTESLNPGDQIFEKIISGMYLGEIVRRVLCKIAEEASLFGDTVPPKLVKVPFILRTPDMS  
AMHHDTSSDLKVVVDILKNVLEISNTSLKVRKVVVELCNIIVATRGARLAAAGIVGVLKKV  
GKDALKDGEKQRTVVVALDGGLYEHYNEYSKCMENLRELLGEEVSESVVIEHSNDGSGIG  
AALLAASHSQYLGVDDES

>Pav | XP\_021807184.1

MGKVAVGAAVCAAAVCAAAAALVVRHRMKSSGRWARAMAILREFEDKCGTPIGKLRQVAD  
AMTVEMHAGLASEGGSKLKMLISYVDNLPTGDEQGLFYALDLGGTNFRVLRVQLGGKEKR  
VVKQEFDEVSIPPNLMTGTSEALDFDFAEALAKFVATEGEGFHPAPGRQRELGFSTFSFPV  
WQTSIASGTLIKWTKGFNIEDAVEQDVVVELTKSVEKIGLDMRVTALVNDTIGTLAGGRY  
HNQDVIAAVILGTGTNAAAYVERAHAI PKWHGLLPKSGEMVINMEWGNFRSSHLPLTEYDQ  
ALDAESLNPGDQIFEKIISGMYLGDIVRRVLCKMAEEASFFGDVPPKLVKVPFILRTPDM  
SAMHHDTSSDLRVVGSGLKDILEISNTSLKMRKVVVALCDIVATRAARLSAAGIMVLLK  
LGRDVTKEGEKQKSAVALDGGLYEHYTEFRSTSMESTLKELLGDEVAEHSVEHSNDGSGI  
GAALLAASHSQYLEVEES

>Pav | XP\_021810618.1

MGKVAVGLAVGVAVAACAVATVVVGRIRSRKWRVVGVLKELEQSCETTGRRLRQVVD  
AMAVEMHAGLASDGGSKLKMLLTFVDKLPNGSEKGTYYALDLGGTNFRVLRVKLEGTRSS  
TLEHDVYRQPIPQDLMTGSSSEDLDFDIASSLKEFVEREGDISELSLDRRRELGFSTFPV  
KQMSVSSGTLKWKTKGFSIEDMVGREIAGCLEKAMTRKGLNMRVAALVNDVSVGLALGHY  
HDTDTVAAVIIGTGTNACYLERTDAI IKSQGLLTTSGMVVNMEWGNFWSHLPRTVYDI  
ELDADSPNPNDQGFELISGMYLGDVVRVIVRMSQESDIFDPISSKLSMPFILRTPLIA  
AMHEDDSPDLEEVRRILRDNLEIPDVPLKVRKLIIVKVCVTRRAARLAAAGIVGILKKI  
GRDGSGGIAGGRSRSDQKMRRTVVAMEGGLYTGTYMFRDYLHEALTEILGEDIAQHVIK  
VTEDGSAMGAALLAASHSSYPVDSVQLL

>Pav | XP\_021826638.1

MSVAATSPAVGSFYLRRRSPSTAMSMRFRMAVRSAAVSVTPLLTKLHNSATPLPLLRH  
VADAMAADMRAGLAVEGSDLKMLSIVDLSLPSGNEEGLFYALDLGGTNFRVLRVQLGGK  
QERVIATEFDQVSIKPELMFGTSEQLFDFIAAGLAKFAQKEGNKFHLP TGTKREIGFTFS  
FPVKQTSIDSGILIKWKTKGFSVSGTAGKDVVACLNEAMERQGLDMRVSALVNDTVGTLG  
ARYWDDDDVMVAVILGTGTNACYVERADAI PKLQGVSSSGKTIINTEWGAFS DGLPLTEF  
DREMDAASINPGEQIFEKTI SGMYLGEIVRRVLVKMAEADALFGESVPEKLS TPFLRTP  
DICAMQQDISDDLQDVGSILYNVAGVESNLSARKIVVDVCDTIVKRGGRLAGAGIVGILQ  
KMEEDSKDLIFGKRTVVAMDGGLYENYPQYRRYLQEA VTELLGTEISKNVVIEHSDKDGSG  
IGAALLAANSQYT

>Pav | XP\_021829525.1

MRKEVLVAAALTATATVVVAAALLRQWKREKQRQWRETQKILRKFARDCATPVPKLWLVS  
NALVSDVKACLASSGITITLNLVSYVAPLPSGDEEGFYGVNLRGTNFIILCARLGGKN  
KPI SIDLHREEIPIPSNLMAATSKELDFVAVELGKFI SEHPDGQADSAEENKLGCI VSCP  
VDQAVVSHGTAIKWKSFAADSKVGKLVSDFNQALEEHGVNLRVYAMVDDTVGNLAGGRY  
YTKESVAAVTLAMGTDAAYVEPADAALQWHGSPKLGEMVISTQWGD FSSPHLPITIFDT  
CLDAESSNPGRRRFEKLI SGMYLGEIVRRVLLKMAQETALFGDHVPSKLMTPYQLSSPDM  
AAMHQDASDDREIVGEKLRKVF EITSTSPRVREVVSEVCDIIAERGARLAGAGILGIKK  
LGR IENKKS VVTVEGGLYEHYRVFRNYLNSVWEMLGNDLSDNVVIEHSHGGSGTGALFL  
AASQMDMQNDPDPDNDNDPDSNDNDHDPDPDADT

>Pdu | XP\_034201006.1

MSVAATPPAVGPFYLRRRSPSTAMSMRFRMAVRSAAVSVTPLLTKLHNSATPLPLLCH  
VADAMAADMRAGLAVDGGSDLKMLSIVDLSLPSGNEEGLFYALDLGGTNFRVLRVQLGGK  
QERVIATEFDQVSIKPELMFGTSEQLFDFIASGLAKFAQKEGNKFHLP TGTKREIGFTFS  
FPVKQTSIDSGILIKWKTKGFSVSGTAGKDVVACLNEAMERRGLDMRVSALVNDVAVGTLG  
ARYWDDDDVMVAVILGTGTNACYVERADAI PKLQGVSSSGRTIINTEWGAFS DGLPLTEF  
DREMDAASINPGEQIFEKTI SGMYLGEIVRRVLVKMAEADALFGESVPEKLS TPFA LRTP  
DICAMQQDISDDLQDVGSILYNVSGVESNLSARKIVVHVCDTIVKRGGRLAGAGIVGILK  
KMEEDSKGLIFGKRTVVAMDGGLYENYPQYRRYLQEA VTELLGTEISKNVVIEHSDKDGSG  
IGAALLAANSQYA

>Pdu | XP\_034207972.1

MGKKAVVIITAAAVCAAAAALVVRHRMRSSGRWARATAI I KELEEKCGTPIGKLRQVADA  
MAVEMHAGLASEGGSKLKMIISYVDNLPTGTEKGLFYALDLGGTNFRVLRVQLGGKGRGI  
ISQEFTEVSI PENLMVGTSDALFDYIAAELAKFVAKEGQDYQLPPGRQRELGFSTFPVL  
QSSINSGTLIKWKTKGFSIDDAVGQDVVAELSKAIEKQGLDMRVSALVNDTVGTLGGRYV  
NGDVVAAVILGTGTNAAVERAHAI PKWHGLLPKSGDMVINMEWGNFKSAHLPLTEYDHS  
LDTESLNPGDQIFEKLI SGMYLGEIVRRVLCKIAEEASLFGDTVPPKLVPFILRTPDMS  
AMHHDTSDDLKVV RDILKNVLEISNTSLKVRKIVVELCNIVATRGARLAAAGIVGVLKKV  
GKDAFKDGEKQRTVVALDGGLYEHYNEYSKCMEN TLRELLGEEVSESI VIEHSNDGSGIG  
AALLAASHSQYLGVDES

>Pdu | XP\_034211665.1

MGKLAVGLAVGVAVAACAVATVVVGRIRSRKWRVVGVLKELEQSCETTGRRLRQVVD  
AMAVEMHAGLASDGGSKLKMLLTFVDKLPNGSEKGTYYALDLGGTNFRVLRVKLEGTRSS  
TLEHDVYRQAI P QDLMTGSSSEDLDFDIASSLKEFVEREGDISELSLDRRRELGFSTFPV  
KQMSVSSGTLKWKTKGFSIEDMVGREIAGCLENAMTRKGLNMRVAALVNDVSVGLALGHY

HDTDTVAAVI IGTGTNACYLERTDAI IKSQGLLTTSGGMVVNMEWGNFWSSHLPRPLYDI  
ELDADSPNPNDQGF EKLI SGM YLGDVRRVIVRMSQESDIFDPISSKLSMPFILRTPLIA  
AMHEDDSPDLEEVRRILRDNLEILDVPLKVRKLI VKVCDVVTARRAARLAAAGIVGILKKI  
GRDGSGGIAGGRSRSDQKMRRTVVAMEGGLYTG YTMFRDYLHEALTEILGEDIAQHVI IK  
VTEDGSAMGAALLAASHSSYPVDSVQLL

>Pdu | XP\_034223332.1

MGKVAVGAAVCAAAVCAAAAALVVRHRMKCSGRWARAMAILREFEDKCGTPIGKLRQVAD  
AMTVEMHAGLASEGGSKLKMLISYVDNLPTGDEQGLFYALDLGGTNFRVIRVQLGGKEKR  
VVKQEFDEVSIPP NLMTGTSEALFDFIAEALAKFVATEGEGFHPAPGRQRELGFTFSFPV  
WQTSIASGTLIKWTKGFNIEDAVEQDVVGELTKSVEKIGLDMRV TALVNDTIGTLAGGRY  
HNQDVIAAVILGTGTNAAYVERAHAI PKWHGLLPKSGEMVINMEWGNFRSSHLPLTEYDQ  
ALDAESLNPGDQIFEKIISGM YLGDIVRRVLRKMAEEASFFGDVVPKPKLVPFILRTPDM  
SAMHHD TSPDLRVVGSKLKDILEISNTSLKMRKVVALCDIVATRGARLSAAGIMGV LKK  
LGRD TVKEGEKQKSVVALDGGLYEHYTEFR TSMESTLKELLGDEVAEHI SVEHSNDGSGI  
GAALLAASHSQYLEVEES

>Pdu | XP\_034223333.1

MGKVAVGAAVCAAAVCAAAAALVVRHRMKCSGRWARAMAILREFEDKCGTPIGKLRQVAD  
AMTVEMHAGLASEGGSKLKMLISYVDNLPTGDEQGLFYALDLGGTNFRVIRVQLGGKEKR  
VVKQEFDEVSIPP NLMTGTSEVEQDVVGELTKSVEKIGLDMRV TALVNDTIGTLAGGRYH  
NQDVIAAVILGTGTNAAYVERAHAI PKWHGLLPKSGEMVINMEWGNFRSSHLPLTEYDQA  
LDAESLNPGDQIFEKIISGM YLGDIVRRVLRKMAEEASFFGDVVPKPKLVPFILRTPDMS  
AMHHD TSPDLRVVGSKLKDILEISNTSLKMRKVVALCDIVATRGARLSAAGIMGV LKKL  
GRD TVKEGEKQKSVVALDGGLYEHYTEFR TSMESTLKELLGDEVAEHI SVEHSNDGSGIG  
AALLAASHSQYLEVEES

>Ppe | XP\_007203872.1

MGKVAVGAAVCAAAVCAAAAALVVRHRMKCSGRWARAMAILREFEDKCGTPIGKLRQVAD  
AMTVEMHAGLASEGGSKLKMLISYVDNLPTGDEQGLFYALDLGGTNFRVIRVQLGGKEKR  
VVKQEFDEVSIPP NLMTGTSEALFDFIAEALAKFVATEGEGFHPAPGRQRELGFTFSFPV  
WQTSIASGTLIKWTKGFNIEDAVEQDVVGELTKSVEKIGLDMRV TALVNDTIGTLAGGRY  
HNQDVIAAVILGTGTNAAYVERAHAI PKWHGLLPKSGEMVINMEWGNFRSSHLPLTEYDQ  
ALDAESLNPGDQIFEKIISGM YLGDIVRRVLRKMAEEASFFGDVVPKPKLVPFILRTPDM  
SAMHHD TSPDLRVVGSKLKDILEISNTSLKMRKVVALCDIVATRGARLSAAGIMGV LKK  
LGRD TVKEGEKQKSVVALDGGLYEHYTEFR TSMESTLKELLGDEVAEHI SVEHSNDGSGI  
GAALLAASHSQYLEVEES

>Ppe | XP\_007211826.1

MGKVAVGLAVGVAACAVATVLVGRRI RSRKWRRVVGV LKELEQSCETT VGR LRQVVD  
AMAVEMHAGLASDGGSKLKMLLTFVDKLPNGSEKGTYYALDLGGTNFRVLRVKLEGTRSS  
TLEHDVYRQAIPQDLMTGSSEDLFDFIASSLKEFVEREGDISELSLDRRGELGFTFSFPV  
KQMSVSSGTLKWKTKGFSIEDMVGREIAGCLENAMTRKGLNMRVAALVND SVGSLALGHY  
HDTDTVAAVI IGTGTNACYLERTDAI IKSQGLLTTSGGMVVNMEWGNFWSSHLPRPLYDI  
ELDADSPNPNDQGF EKLI SGM YLGDVRRVIVRMSQESDIFDPISSKLSMPFILRTPLIA  
AMHEDDSPDLEEVRRILRDNLEILDVPLKVRKLI VKVCDVVTARRAARLAAAGIVGILKKI  
GRDGSGGIAGGRSRSDQKMRRTVVAMEGGLYTG YTMFRDYLHEALTEILGEDIAQHVI IK  
VTEDGSAMGAALLAASHSSYPVDSVQLL

>Ppe | XP\_007215785.2

MGKKA VVIITAAAVCTAAAALVVRHRIRSSGRWARATAI I KELEEKCGTPIGKLRQVADA  
MAVEMHAGLASEGGSKLKMIISYVDNLPTGTEKGLFYALDLGGTNFRVLRVQLGGKGRGI  
ISQEFTEVSI PENLMVGTSDALFDYIAAELAKFVAKEGQDYQLPPGRQRELGFTFSFPVL  
QSSINS GTLIKWTKGFSIDDAVGQDVVAELSKAIEKQGLDMRV SALVNDTVGTLAGGRYV  
NGDVVAAVILGTGTNAAYVERAHAI PKWHGLLPKSGDMVINMEWGNFKSAHLPLTEYDHS  
LDTESLNPGDQIFEKLI SGM YLGEIVRRVLRCKIAEEASLFGD TVPPKPKLVPFILRTPDMS  
AMHHD TSSDLKVVRDILKNVLEISNTSLKVRKIVVELCNIVATRGARLAAAGIVGV LKKV  
GKDAFKDGEKQRTVVALDGGLYEHYNEYSKCMEN TLRELLGEEVSESI VIEHSNDGSGIG  
AALLAASHSQYLGVD E S

>Ppe | XP\_007222247.1

MSVAATPPAVGPFYLRRRSPSTAMSMRFRMAVRSAAVSVTPLLTKLHNSATPLPLLRH  
VADAMAADMRAGLAVDGGSDLKMILSYVDSLPSGNEEGLFYALDLGGTNFRVLRVQLGGK  
QERVIAEFDFQQLFDFIASGLAKFAQKEGNKFHLP TGTKREIGFTFSFPVKQTSIDSGIL  
IKWTKGFSVSGTAGKDVVACLNEAMERRGLDMRVSALINDAVGTLGARYWDDDDVMVAVI  
LGTGTNACYVERADAI PKLQGVSSSGRTIINTEWGAFSDGLPLTEFDREMDAASINPGE  
QIFEKTI SGMYLGEIVRRVLVKMAEADALFGESVPEKLS TPFPALRTPDICAMQQD ISDDL  
QDVGSILYNVAGVESNLSARKIVVDVCDTVVKRGGRLAGAGIVGILQKMEEDSKGLIFGK  
RTVVAMDGGLYENYPQYRRYLQEAVTELLGTEISKNVVIEHSDGSGIGAALLAAANSQY  
A

>Ppe | XP\_007222248.1

MSVAATPPAVGPFYLRRRSPSTAMSMRFRMAVRSAAVSVTPLLTKLHNSATPLPLLRH  
VADAMAADMRAGLAVDGGSDLKMILSYVDSLPSGNEEGLFYALDLGGTNFRVLRVQLGGK  
QERVIAEFDFQVSI PKELMFGTSEQLFDFIASGLAKFAQKEGNKFHLP TGTKREIGFTFS  
FPVKQTSIDSGILIKWTKGFSVSGTAGKDVVACLNEAMERRGLDMRVSALINDAVGTLG  
ARYWDDDDVMVAVILGTGTNACYVERADAI PKLQGVSSSGRTIINTEWGAFSDGLPLTEF  
DREMDAASINPGEQIFEKTI SGMYLGEIVRRVLVKMAEADALFGESVPEKLS TPFPALRTP  
DICAMQQD ISDDLQDVGSILYNVAGVESNLSARKIVVDVCDTVVKRGGRLAGAGIVGILQ  
KMEEDSKGLIFGKRTVVAMDGGLYENYPQYRRYLQEAVTELLGTEISKNVVIEHSDGSG  
IGAALLAAANSQYA

>Ppe | XP\_020420850.1

MRKEVVVAAALTATATVVVAAALLRQWKRKKQRQWRETQKILRKFARDCATPVPKLWLVS  
NALDSDMKAFLESSGTITTLNMLVSYVASLPSGDEEGFYGVNLRGTNFIILCARLGGKN  
KPI SDFREEIPIPSNLMAATSKELDFVAVELGKFI SEHPDGQADSAEENKLGCI VSCP  
VDQAVVSHQTAIKWKSFSADSKVGGKLVSDFNQALEEHGVNLRVYAIQVDDTVGNLAGGR  
YINKESVAAVTLAMGTDAAYVEPADAALQWHGSPKLGEMVISTQWGDFSSPHLPITIFD  
TCLDAESSNPGRRRFEKLISGMYLGEIVRRVLLKMAQETALFGDHVPSKLMTPYQLSSPD  
MAAMHQDASDDREIVGEKLT KVFGITSTSPRVREVVSEVCDIIAERGARLAGAGILGI IK  
KLGRIENKKS VVTVEGGLYEHYRVFRNYLNSVWEMLGNDLSDNVVIEHSHGGSGTGALF  
LAASQMDMQNDPDLNDNVDPPSDNNDPDPDHPDPDADT

>Sly | NP\_001233957.1

MKKVTVGVAVVVGAAAVCAVAVLIVNHRMRKSSKWRGRAMAILREFEЕКCKTQDAK LKQVAD  
AMTVEMHAGLASEGGSKLKMLITYVDNLPTGDEAGVFYALDLGGTNFRVLRVQLGGKDGG  
IIHQEFAEASIPPSLMVGTSEALFDYIAAELAKFVAAEEEFHQP PGKQRELGF TFSFPV  
MQTSINSGNIMRWTKGFSIDDAVGQDVV GELTKAMKRKGVD MRVSALVNDTVGTLAGGKY  
TQKDVAVAVILGTGTNAAAYVERVQAI PKWHGPVPKSGEMVINMEWGNFRSSHLPLTEYDH  
ALDNESLNPGEQIFEKMTSGMYLGEILRRVLLRVAEEAGVFGDEVPPKLKEPFVLRTPDM  
SAMHHDTSDDLKVVGKLDKILEISNTSLKTRKLVVELCNIVATRGARLAAAGVLGILKK  
MGRDTPKQGGSERTVIAMDGGLYEHYTEYRMCLENSLKDLLGEELATSIVFVHSNDGSGI  
GAALLAASHSMYLEDDQDA

>Sly | NP\_001234406.2

MKKATVGVAVVVGTA AAVAVAALVMRHRMGKSSKWARARAILKEFEЕКCATPDAK LKQVAD  
AMTVEMHAGLASEGGSKLKMLISYVDNLPTGDEAGVFYALDLGGTNFRVLRVQLGGKDGG  
IMHQEFAEASIPPNLMVGTSEALFDYIAAELAKFVDEEГEKFHPPP GKQRELGF TFSFPI  
MQTSINSGTLIRWTKGFSIDDTVGDVVAELTKAMQKREIDMRVSALVNDTVGTLAGGRF  
TDKDVSI AVILGTGTNAAAYVERAQAIPKWHGPLPNSGEMVINMEWGNFRSSHLPLTQYDN  
AMDTDSLNPGEQIFEKICSGMYLGEILRRVLLRMAKEAGIFGEEVPPKLKNSFILRTPEM  
SAMHHDTSDDL RVVGDKLDKILEISNTSLKTRRLVVELCNIVATRGARLAAAGILGI IKK  
MGKDTPRESGPEKIVVAMDGGLYEHYTEYSKLENTLVELLGEMATSIVFKHANDGSGI  
GAALLAASNSVYVEDK

>Sly | NP\_001234710.1

MGKLVV GATVVCTAAVVCVTVLLMKHRVKNSGEWGKVEALLKDFEЕКCATPVEK LKQVA  
DAMTVEMQAGLASEGGSKLKMLISYVDNLPTGDEKGLFYALDLGGTNFRVMRVQLGGKЕК  
RIVKHEVKEVSI PQNVMTGSSSEVLFDFIATALAEFVATEGDDFHLPPGRQRELGF TFSF

PVKQLSIASGTLIKWTKGFSIEDLVGQDVVGGELAKAMERAGLDVRVAALVNDTVGTLAGG  
RYNNPDVIAAVILGTGTNAAAYVERAHAIPKWHGLLPKSGEMVINMEWGNFRSSHLPVTEY  
DQNLDIESLNPGEQIYEKIIISGMYLGEILRRVLCRMAEEASLFGDYVPSKLVKVPFVLRTP  
DMAAMHHDSEADLKVVGKLDKIDILEVFNSTLKMRIIVVELCDIITSRGARLSAAGIVGIL  
KKLGRDFTFKDGEKQRSVIAVDGALFEHYTKFRNCLKETMKELLGDAADSTVIELSNDGSG  
VGAALLAASHSQYTDLEES

>Sly|NP\_001234717.1

MSVTVSSPAVRSFHVSRSPHKTI SRPRVII SAVRSTDSLGVAPILTKLQKDCATPLPVL  
HVADAMADDMRAGLAVDGGSDLKMI LSYVDTLPTGNEKGLFYALDLGGTNFRVLRVQLGG  
KEERVVATEFEQVSI PQELMFATSEELDFDIASALGKFAQKEGGNFELQQGRTREIGFTF  
SFPVKQTSIRTGILIKWTKGFAVSGTAGKDVVACLNEAMERRGMDMQVSALVNDTVGTLA  
GARYWDDAMVAVILGTGTNACYVERVDAIPKLAKRMSKSPITIVNTEWGAFSNGLPLTE  
FDREMDAESINPGEQIFEKTI SGMYLGEIVRRVLLVMAKVGGLFGSSYVPEKLVTPFVLR  
TPDICAMQQDTSIDLEAVESVLYDVAGVKS DLSARKTVVDICDTIAKRGGRLAGAGIVGI  
LQKMEEDSKGLIFGKRTVVAMDGGLYEHYPQYRGLYQEAVTELLGSEISKNVVIEHSDKD  
SGIGAALLAANSKYEHDD

>Sly|XP\_004231963.1

MKKDVVVLAAATTISTIVAALLVLRQWKRSEQRWRHAQRILRKFARECATPIPKLWQIA  
DDLVAQMOSGLNSTQSTLQMLPSCPLSPNGDEKGLFYGINLRGTNFIIVQARLGGRNAP  
MSRIGGRCEPISDLYRQEISIPPNIIEASSQELFDWITVELGKFISLHSEGLQGGEKNLG  
FTVSPTIAEVAASRETAITWKDSLLGDAAGNKLLEINVAMEKHSVDKRVFSLVDDTIGV  
LAGGRYYSKESVAAVTLGMDTNAAYIESAQSVVKKWPDQTPKPEEIAINTHWGNFRSSHLP  
ITEFDTSLDAESSYPGSQIFEKLI SGTYLGETVRRVLLKMAQESALFGDIVPPKLAIPYL  
LRSPDMAAMHQDTS EDEYI IDEKLG EIFEITNSTTMARELVAEICDVVAERGARLVGAGI  
VGIVKKLDRLSNRISIIITVEGGVYEHYRVRFRNYLHSSVWEMLGNEFSDNVIIEHSHGGSG  
ASSIYIAASQP

>Sly|XP\_004251354.1

MGR LGVGLAVGCAMAACIVAAAMVGKRVNKR SKWLKMKVLEEELEESCDTTVFRLKQVVD  
AMAVEMHAGLASEGGSKLKMLLTYVDKLPNGREEGTYYALDLGGTNFRVLRVHLGDQRSA  
ILGQDIERQPI PQHLMTSTSEDLDFDIASSLKDFIEKEGNDLEQTS PRRRGLGFTFSFPV  
KQSSVSSGILMKWTKGFAIEDTIGRDVSECLQLALS RKGLDVRVAALINDTVGTLALGHY  
NDEDTVAAVII GTGTNACYLERADAI IKCQGLLTTSGSMVVMWEGNFWSSHLPRTSYDI  
DLDVASPNPNDQGF EKMI SGMYLGDIVRRVLLRMSKQSDDFGPSSSKLAVPFVLRTP LMA  
AMHEDDSPDLSEVAKI LEEVLELPDVPVKVRKLVVKVCDVITRRAARLAAAGIVGILKKI  
GRDGSGGIASGKFRSNRPSRLRRTVVAIEGGLYTSYTTFREYLNEAMAEILGEEVSPYVI  
LRVMEDGSGTGAALVAAANSLPEAADTVQLQ

>Sly|XP\_010313255.1

MGR LGVGLAVGCAMAACIVAAAMVGKRVNKR SKWLKMKVLEEELEESCDTTVFRLKQVVD  
AMAVEMHAGLASEGGSKLKMLLTYVDKLPNGREEGTYYALDLGGTNFRVLRVHLGDQRSA  
ILGQDIERQPI PQHLMTSTSEDLDFDIASSLKDFIEKEGNDLEQTS PRRRGLGFTFSFPV  
KQSSVSSGILMKWTKGFAIEDTIGRDVSECLQLALS RKGLDVRVAALINDTVGTLALGHY  
NDEDTVAAVII GTGTNACYLERADAI IKCQGLLTTSGSMVVMWEGNFWSSHLPRTSYDI  
DLDVASPNPNDQGF EKMI SGMYLGDIVRRVLLRMSKQSDDFGPSSSKLAVPFVLRTP LMA  
AMHEDDSPDLSEVAKI LEEVLELPDVPVKVRKLVVKVCDVITRRAARLAAAGIVGILKKI  
GRDGSGGIASGKFRSNRPSRLRRTVVAIEGGLYTSYTTFREYLNEAMAEILGEEVSPYVI  
LRVMEDGSGTGAALVAAANSLPEAADTVQLQ

>Sly|XP\_010322313.1

MKKATVGA VVVGTAAAVAVAALVMRHRMGKSSKWARARAILKEFEKCATPDAK LKQVAD  
AMTVEMHAGLASEGGSKLKMLISYVDNLPTGDEAGVFYALDLGGTNFRVLRVQLGGKDGG  
IMHQFEAEASIPPNLMVGTSEALFDYIAAELAKFVDEEKEKFHPPPGKQRELGF TFSFP I  
MQTSINSGTLIRWTKGFSIDDTVGDVVAELTKAMQKREIDMRVSALVNDTVGTLAGGRF  
TDKDVSI AVILGTGTNAAAYVERAQAIPKWHGGLPNSGEMVINMEWGNFRSSHLP LPTQYDN  
AMDTDSLNPGEQIFEKICSGMYLGEILRRVLLRMAKEAGIFGEEVPPKLN SFILRTPEM  
SAMHHD TSSDLRVVGD KLDILEISNTSLKTRRLVVELCNIVATRGARLAAAGILGIKK

MGKDTPRESGPEKIVVAMDGGLYEHYTEYSKCLENTLVELLGKEMATSIVFKHANDGSGI  
GAALLAASNSVYVEDK

>Sly|XP\_019066821.1

MRVQLGGKEKRIVKHEVKEVSI PQNVMTGSSSEVLDFDIATALAEFVATEGDDFHLPPGR  
QRELGF TFSFPVKQLS IASGTLIKWTKGFSIEDVVGQDVGELAKAMERAGLDV RVAALV  
NDTVGTLAGGRYNNPDVIAAVILGTGTNAAYVERAHAIPKWHGLLPKSGEMVINMEWGNF  
RSSHLPVTEYDQNLDI ESLNPGEQIYEKIIISGMYLGEILRRVLCRMAEEASLFGDYVPSK  
LKVPFVLRTPDMAAMHHDESADLKVVGNKLDILEV PNSTLKM RKIVVELCDIITSRGAR  
LSAAGIVGILKKLGRDTFKDGEKQRSVIAVDGALFEHYTKFRNCLKETMKELLGDAADST  
VIELSNDGSGVGAALLAASHSQYTDLEES

>Sly|XP\_025885482.1

MKKDVVVLAAATTISTIVA AVLLVRQWKRRSEQRWRHAQRILRKFARECATPIPKLWQIA  
DDLVAQM QSGLNSTQSTLQMLPSCLPSL PNGDEKGLFYGINLRGTNFIIVQARLGGRNAP  
MSRIGGRCEPISDLYRQEISIPPNIIEASSQELFDWITVELGKFISLHSEGLQGGEKNLG  
FTVSPTIAEVAASRETAITWKDSLLGDAAGNKL LNEINVAMEKHSVDKRVFSLVDDTIGV  
LAGGRYYSKESVAAVTLG MGTNAAYIESAQSVVKWPDQTPKPEEIAINTHWGNFRSSHLP  
ITEFDTS LDAESSYPGSQIFEK LISGTYLGETVRRVLLKMAQESALFGDIVPPKLAIPYL  
LRSPDMAAMHQDTS EDEY EIDEKLGEIFE EGVKHVICLIKVLLCRR LHTRS FVYRFL LAT  
LAN

>Sly|XP\_025885483.1

MKKDVVVLAAATTISTIVA AVLLVRQWKRRSEQRWRHAQRILRKFARECATPIPKLWQIA  
DDLVAQM QSGLNSTQSTLQMLPSCLPSL PNGDEKGLFYGINLRGTNFIIVQARLGGRNAP  
MSRIGGRCEPISDLYRQEISIPPNIIEASSQELFDWITVELGKFISLHSEGLQGGEKNLG  
FTVSPTIAEVAASRETAITWKDSLLGDAAGNKL LNEINVAMEKHSVDKRVFSLVDDTIGV  
LAGGRYYSKESVAAVTLG MGTNAAYIESAQSVVKWPDQTPKPEEIAINTHWGNFRSSHLP  
ITEFDTS LDAESSYPGSQIFEK LISGTYLGETVRRVLLKMAQESALFGDIVPPKLAIPYL  
LRSPDMAAMHQDTS EDEY EIDEKLGEIFE EGVKHVICLIKVLLYN

>Sly|XP\_025885484.1

MKKDVVVLAAATTISTIVA AVLLVRQWKRRSEQRWRHAQRILRKFARECATPIPKLWQIA  
DDLVAQM QSGLNSTQSTLQMLPSCLPSL PNGDEKGLFYGINLRGTNFIIVQARLGGRNAP  
MSRIGGRCEPISDLYRQEISIPPNIIEASSQELFDWITVELGKFISLHSEGLQGGEKNLG  
FTVSPTIAEVAASRETAITWKDSLLGDAAGNKL LNEINVAMEKHSVDKRVFSLVDDTIGV  
LAGGRYYSKESVAAVTLG MGTNAAYIESAQSVVKWPDQTPKPEEIAINTHWGNFRSSHLP  
ITEFDTS LDAESSYPGSQIFEK LISGTYLGETVRRVLLKMAQESALFGDIVPPKLAIPYL  
LRSPDMAAMHQDTS EDEY EIDEKLGEIFE RRRGLSM

>Sly|XP\_025885485.1

MKKDVVVLAAATTISTIVA AVLLVRQWKRRSEQRWRHAQRILRKFARECATPIPKLWQIA  
DDLVAQM QSGLNSTQSTLQMLPSCLPSL PNGDEKGLFYGINLRGTNFIIVQARLGGRNAP  
MSRIGGRCEPISDLYRQEISIPPNIIEASSQELFDWITVELGKFISLHSEGLQGGEKNLG  
FTVSPTIAEVAASRETAITWKDSLLGDAAGNKL LNEINVAMEKHSVDKRVFSLVDDTIGV  
LAGGRYYSKESVAAVTLG MGTNAAYIESAQSVVKWPDQTPKPEEIAINTHWGNFRSSHLP  
ITEFDTS LDAESSYPGSQIFEK LISGTYLGETVRRVLLKMAQESALFGDIVPPKLAIPYL  
LRSPDMAAMHQDTS EDEY EIDEKLGEIFE RRRGLSM

>Sbi|XP\_002440104.1

MGKAVVVGTA VVACA AVGVALALAHRRRKRDAELLSAEAEERKRRAAAVIEDV ESSLATP  
TALLRSIADAMVTEMERGLRGDIHSQ LKMLISYVDNLPTGDEHGLFYALDLGGTNFRVLR  
VQLGGREKR VVKQYEEVSI PPHLMVGTSMELDFDIAAALAKFVDTEGEDFHLPEGR LRE  
LGF TFSFPVNQTS ISSGTLIKWTKGFSINGTVGEDV VSELSRAMERQGLDMKV TALVNDT  
VGTLAGGRYMDNDVVA AVILGTGTNAAYVEHANAI PKWTGLLPKSGNMVINT EWGSFKSD  
KLPLSEYDKAMDFESLNPGEQIYEKMI SGMYLGEIVRRILLKLAHDASLFGDVVPSKLEQ  
PFILRTPDMSAMHHDS SHDLKTLGAKLKDIVGVADTSLE VRYITRHICDLVAERGARLAA  
AGIYSILKKIGRDKVPSSGGKMPRTVVALDGGLYEHYK KFSSCV EATLTDLLGEEASSSV  
VAKLANDGSGIGAALLAASHSQYGESH

>Sbi|XP\_002440735.1

MVAAAAERVVAELREACAAPAARLNEVAAAMEAEMRAGLREEGGSKIKMII SYVDNLPTG  
NEEGVIFYALDLGGTNFRVLRVHLAGKDKRVAKRESKEVSI PPHLMMSGNASELFGFIASAL  
AKYIASEEGHSNVFDDDKQRELGFTFSFPVVRQTSIASGTLIKWTKAFSIDDVAVGEDVVAE  
LQTAMEKQGVDMRVAALINDTVGTLAAGRYNDEDVVI GVI LGTGSNAAYVEEASAI PKLE  
GELPKSGNMVINTEWGNFDDSSCLPITEYDEALDEESLNPGEQIFEKLISGMYLGEIVRRV  
LLKIASQSSIFGNVSHTLKTRFILRTPDISAMHHDDTPDLRIVAQKLADNLKIMDTSLD  
TRKMVVEICDIVTSRSARLAAAGIVGILRKIGRAVPGDERRSVVAIDGGLFEHYAEFRKC  
LESTLVELLGEAEASKSLVVKLTKDGSGLGAALIAAAQSQ

>Sbi | XP\_002458467.1

MGKGAVVGTAVVVGAAAAAAGVAVVSLRRRRRRRREAEDERKRKAAAVIEEVEQRFSTP  
TALLRGIADAMVEEMERGLRAEPHAPLKMLI SYVDNLPTGDEQGLFYALDLGGTNFRVIR  
VQLGGRDKRVVKQYEEVSI PPHLMVGTSTELDFDIAAELEKFVRTEGEDFHL PNGKQRE  
LGFTFSFPVHQTSISSGTLIKWTKGFSINGTVGEDVVAELSRAMERQGLDMKVAALVNDT  
VGTLAGGRYADNDVVTAVILGTGTNAAYVEHANAI PKWTGLLPRSGNMVINMEWGNFRSD  
KLPMSFYDKSLDFESLNPGEQIYEKMSGMYLGEIVRRILLKLAHDASLFGDVVPPKLEQ  
LFILRTPDMSAMHDDTSHDLKHLGAKLKDILGVPDTSLEARYITLHVCDLVAERGARLAA  
AGIYIGILKKGKDKLLSDFSQQRTVVAIDGGLYEHYKFKFSACLEATLTDLLGEEVASSVV  
VKLANDGSGIGAALLAASHSQYAEVA

>Sbi | XP\_002459072.1

MGRVGLGVAAGCAAATCAIAAALVARRASARARWRAVALLREFEEGCATPTPRLRQVVD  
AMVEMHAGLASDGGSKLMLLTFVDALPAGNEQGTYYSIDLGGTNFRVLRVEVGAVSVV  
TSREVKLPIPEELTKGTIEELFNFMVAMTLKEFVETEDVKDEQRALGFTFSFPVVRQTSVSS  
GSLIRWTKGFLIEDAVGKDVAQCLNEALARSGLNVRVTALVNDTVGTLALGHYYDEDTVA  
AVIIGAGTNACYIERTDAI IKCQGLLTNSGGMVVNMEWGNFWSSHLPRTPYDISLDDETQ  
NRNDQGFEMISGIYLGELIARLVLRMALESDFVGDAAADHLSTPFTLSTPLLAIRKDDS  
PDLSEVRRILQEHKIMDTPKTRRLVVKVCDIVTRRAARLAAAGIVGILKKLGRDGSV  
ASSGRTRGQLRRTVVAIEGGLYEGYPVFREYLDEALVEILGEEVAQTVALRVTEDGSGAG  
AALLAAVHSSNRQQGSI

>Sbi | XP\_021312505.1

MRKPAALVASTVVFAAAAVAAMARQRLREARRWARAAAAMLRDLQERCAAPAERLRQVAD  
AMAAEMRAGLASNDSEGESGSTVLLKMLVTVYVDSLPSGGEKGLFYALDLGGTNFRVLR IQ  
FGGKEQRIVKQESKGVSI PQHLMRSGSNELDFDIAAALAKFVASEGEDFHLPEGMQRQLG  
FTFSFPVNQNSVASGTLIKWTKGFAIDEMVGKDVVAELNKAI ERQGIDMKITALVNDTVG  
TLAAGRYVDNDTVAAVILGTGTNAAYIEHMNSIPKWCPPPESSDMVINMEWGNFRSSHL  
PLTEFDVALDAESLNPGEQIYEKLSGMYMGEIVRRVLLKMAQDASL FADNVPPKLEIPY  
ILRTHVLMMHQDTPDLRTVGINLKEIFGIENTCCKTRKLVVDVCEAVATRGARLAAAAG  
IHGILKKLGRDIANPDKQKTVIAVDGGVYKYTFFAQCMESTLRDLLGEEVASSVVIKLA  
EDGSGTGAALLAASYSQRFAMDD

>Vvi | NP\_001267834.1

MSVSAVGSFVLSVSPGKLRPRMVRSSAVSVAPILTHLQKQCATPLPVL RHVADAMAAD  
MRAGLAVDGGSDLKMIISYVDTFPTGNEKGLFYALDLGGTNFRVLRVQLGGKDERVIATE  
FEQVTIPQELMFGTSEELDFDIACGLANFAKKEGGKFHLP SGRKREIGFTFSFPVKQTSI  
DSGILMKWTKGFAVSGTAGRDVACLNEMERQGLDMQVSALVNDTVGTLAGARYWDDDV  
MVAVILGTGTNACYVERTDVI PKLQGMSSSGRTIISTEWGAFSNGPLTEFDRDMDAAS  
INPGEQIFEKTI SGMYLGEIVRRVLLKMAEAGALFGEYVSEKLSTPFILRTPDICAMQQD  
NSDHLDAVGAILYDVAGVKS DLSVRKMVVEVCDTIVKRGRLAGAGIVGILQKMEEDSKD  
LIFGKRTVVAMDGGLYENYPQYRRYLKEAVTELLGLEMSKNVVI EHSKDGSGIGAALLAA  
SNSKY

>Vvi | XP\_002283608.1

MGKVAVGAAVVCAATVCAAFLIARHRMRSSGRWARAMA I LREFEEKCGTPIAKLRQVAD  
AMTVEMHAGLASEGGSKLMIISYVDNLPTGDEKGLFYALDLGGTNFRVLRVQLGGKDKR  
VVKQEFEEVSI PPHLMVGS DALFDYIAAALAKFVATEGEGHLVSPGRQRELGFTFSFPV  
RQSSISSGLIKWTKGFSIEDAVGQDVV GELTKAMERIGLDMRV SALVNDTIGTLAGGRY  
YDQDVVAAVILGTGTNAAYVERAQSIPKWHGLLPKSGDMVINMEWGNFRSSHLPLTEYDQ



VLDAESLNPGEQIFEKIISGMYLGDIVRRVLCRMAEEADLFGDTVPPKLIKIPFILRTPDM  
SAMHHDTPDLRVVGSKLKDI LDIPNTSLKTRKVVIELCDIVATRGARLSAAGILGILKK  
LGRDTEMKEGDKQNSVIALDGGLYEHYTEFRTCLESTLKELLGAEVSDNIVIKHSNDGSGI  
GAALLAASHSQYLEEDS

>Vvi | XP\_003635485.1

MRKAVVVAAVTTAAMAAAVAVLWSRWKQESERQWRKTRRILRKFARDCATPVSKLWLVAD  
ALVSDMNEALTSQETTTLNMPISYVASLPSGDEEGLYYGLNLRGSNFLILRARLRGKNES  
ISELHREEVSI PSNVMGGTSQELFDYIALELAKFISEHEVTDDTTPDRQKALGFIVSYPV  
DQAAASSGAAIKWRSFSVTDTAGKALASNFNRALEKHGVNLRVLQLVEDAIGHLAGGRYY  
NRDVAAITLGMATTAAYVEPTQAVPEYQSSSNKSSEMVISMDWGNFNSCHLPITFDFTF  
LDAESSNPGSRIFEKLTSGMYLGEIVRRVLLKMAQETALFGEDVPPKLRTPYLLRSPDMA  
AMHQDTSSEDHEVVHEKLMEIFRITNSTPLAREVVAEVCDIVAERGARLAGAGIVGITKKL  
GRIENKRSVAVTEGGLYEHYRVFRNYMHSSVWEMLGNELSDNVVIEHSHGGSGAGAI FLA  
ASQTNEPNS

>Vvi | XP\_019076347.1

MGKVGFLAVSCAAATCAIAAILVGKRVRSRRKWRVVGVLRLDLEEACETSVGRRLRQVVD  
AMAVEMHAGLASEGGSKLMLLTFVDKLPNGSERGKYALDLGGTNFRVLQIQLGKTS  
ILSCDVERQPIQDLMTSTSEDLDFDIASSLKQFVEREAQNSEFSPVKRRELGF TFSFPV  
KQTSVSSGILIKWTKRFSVKDMVGKDVSECLQHAMTRNGLDMRVAVLVNDTVGTLALGHY  
NDPDTVAAVIIGTGTNACYLERTDAIKCQGLLTTSGGMVVMWGNFWSSHLPRTSYDI  
DLGDSPNPNDQGF EK MISGMYLGDIVRRVILRMSQESDIFGPVSSRLSMPFILSTPSMA  
DMHADESPELMEVARILKEDLQIPDVPLKVRKLVVKVCDVVTTRRAARLAAAGIVGILKKI  
GRDGGSGVASGRSRGSDGKMRRTVVAMDGSLYTRYTMFKEYLHEALCEILGEEVAQYVIL  
KVTEGSGGIGAALLAASHSSSSSSSSSSSSSSSSSSSSSSSVVDSQRLP

>Zma | NP\_001105529.2

MVKAVVVGAAVVACAAGVAVVLERRRRKRADLLGSAEAERRRRRAAAVIEEVESSLATP  
TALLRSIADAMVAEMERGLRGDIHAQLKMLISYVDSLPTGDEHGLFYALDLGGTNFRVLR  
VQLGGKEKRVVKQYEEVSI PPHLMVGTSMELFDFIAAALAKFVGTGEDFQLPEGRQRE  
LGF TFSFPVNQTSISSGTLIKWTKGFSINGTVGEDVVSEL SRAMERQGLDMKATALVNDT  
VGTLAGGRYMDTDVAAVILGTGTNAAYVEHANAI PKWTGLLPKSGKMVINTEWGSFKSN  
KLPLSEYDKAMDFESLNPGEQIYEK MISGMYLGEIVRRILLKLAHEASLFGDVVPPKLEL  
PFILRTPDMSAMHHDSSHDLKTLGAKLKDIVGVADTSLEVRYITRHICDLVAERAARLAA  
AGVYSILKKIGRDKVPSSGGKMPRTVVALDGGLYEHYK KFSSCVEATLTDLLGEEASSSV  
VAKLANDGSGIGAALLAASHSQYQYASD

>Zma | NP\_001123599.1

MVKAVVVGAAVVACAAGVAAVLVHRRRRRDAALLGSAEAERRRRRAAAVIEEVERSLATP  
TALLRGIADAMVAEMERGLRGDIHAQLKMLISYVDNLPTGDEHGLFYALDLGGTNFRVLR  
VQLGGREKRVVKQYEEVSI PPHLMVGTSMELFDFIAAALAKFVGTGEDFQLPEGRQRE  
LGF TFSFPVNQTSISSGTLIKWTKGFSINGTVGEDVVSEL SRAMERQGLDMKATALVNDT  
VGTLAGGRYMDTDVAAVILGTGTNAAYVEHANAI PKWTGLLPKSGKMVINTEWGSFKSN  
KLPLSEYDKAMDFESLNPGEQIYEK MISGMYLGEIVRRILLKLAHDASLFGDVVPTKLEQ  
PFILRTPDMSAMHHDSSHDLKTLGSKLKDIVGVADTSLEVRYITRHICDLVAERARLAA  
AGIYSILKKIGRDKVPSSGSKMPRTVIALDGGLYEHYK KFSSCVEATLTDLLGEEASSSV  
VAKLANDGSGIGAALLAASHSQYQYASD

>Zma | NP\_001146056.1

MRKPAALVVSTAVFAAAAVVAVMARQRLREARRWARAGAVLRDLQERCAAPVERLRQVAD  
AMVAEMRAGLASNDSEGDSGSSVLLKMLVTVVDSLPSGDEKGLFYALDLGGTNFRVLR IQ  
FGGKEQRI V KQESKTVSIPQHLM SRGSNELFDFIAAALAKF IASEGEGFYLP EGMQRQLG  
FTFSFPVKQNSVASGTLIKWTKGFAIDEMVGKDVVAELNKAIKRQGVDM E VTVLVNDTVG  
TLAAGRYVDNDTVAAVILGTGTNAAYIEHMDSIPKWC GPPPESGNMVINMEWGNFRSTHL  
PLTEFDVALDAESLNPDEQIYEK LISGMYMGEIVRRVLLKMAQDASLFS DNVPLELEVPY  
ILR TYHVLMMHQDTPDLRTVGNKLKEVFRIEDTCFKTRKLVVDVCEVVASRAARLAAAG  
IHGILKKLGRDVASPDKQKTVIAVDGGVYKHYTFFAQCMESTLRDLLGEGVASSLVIKLA  
EDGSGTGAALLSASYSQRLQAVDD

>Zma | NP\_001356812.1

MVAAADLEAAERVVAELREACAARLDEVAAMEAEMRAGLREEGGSKIKMIVSFVDNLP  
T GNEEGVFYALDLGGTNFRVLRVQLAGKDRRVAKRDSKEVSI PPHLMMSGNASELFGFIASA  
LAKYVAAAGEGDGRQRELGF TFSFPVRQTSIASGTLIKWTKAFSVDDAVGEDVVAELQTA  
MEKQGVDMRVAALINDTVGTLAAGRYNDEDVVVGVILGTGSNAAYVEEASAI PKLKLEGG  
ELPKSGNMVINTEWGNFYSPCLPITEYDQALDEESLNPGEQIF EKLVSGMYLGEIVRRVL  
LKIASQSSILGDVSHNTLKRTRFSLRTPDISAMHHDGTPDLRVVAEK LADNLRVRDTS LDT  
RKMVVEICDIVTGRSARLAAAGIVGILRKIGRAAPGDERRSVVAIDGGLFEHYAEFRKRL  
EATLVELLGEEASRLVEVKLTKDGSGLGAALIAAAHSQY

>Zma | XP\_008656880.1

MGRVGLGVAAGCAAATCAIAAALVARRASARARWRRRAVALLREFEDGCATPPPRLRQVVD  
AMVEMHAGLASDGGSKLKMLLTFVDALPAGNEEGTYYSIDLGGTNFRVLRVEVGAGSVV  
TRRKVELPIPEELTKGTIEELFN FVAMTLKEFVETEDGNDEQRALGF TFSFPVRQTSVSS  
GSLIRWNGFLIEDAVGKDVAQCLNEALARNGLNVRVTALVNDTVGTLALGHYHDED TVA  
AVIIGAGTNACYIERTDAI IKCQGLLTNSGGMVVNMEWGSFWSSHLPRTPYDISL DDETQ  
NRNDQGF EKMVSGIYLGEIARLVLRMALESDFFGDAADNLCTPFTLSTPLLA AIRKDDS  
PDLSEVRKILQEHLKIPDTP LKTRRLVVKVCDIVTRRAARLAAAGIVGILK KLRDGS  
GVA ASSGRTGGQMRRTVVAIEGGLYEGYPVFREYLDEALVEILGEEVARTVALRVTV DGS  
GAG AALLAAVHSSNRQQGSI

>Zma | XP\_008674565.1

MGRVGLGVAAGCAAATCAIAAALVARRAAARSRRRAVALLREFEDGCATPPPRLRQVVD  
AMVEMHAGLASDGGSKLKMLLTFVDALPAGNEEGTYYSIDLGGTNFRVLRKVEVG DGS  
VV TRRKVELPIPEELIKGTIEELFN FVAVTLKEFVEAEDGKDEQRALGF TFSFPVRQTSVSS  
GSLIRWTKGFLIEDVVGKDVAQCLNEALARSGLNVRVTALVNDTVGTLALGHYHDED TVA  
AVIIGAGTNACYIERTDAI IKCQGLLTNSGGMVVNMEWGNFWSSHLPRTPYDISL DDETQ  
NRNDQGF EKMISSGIYLGEIARLVLRMALESDFVFGDAADNLSTPFTLSTPLLA AIRKDDS  
PDLSEVRRILQDHLKIPDTP LKTRRLVVKVCDIVTRRAARLAAAGIVGILK KLRDGS  
GSI ASSGRTGQLRRTVVAIEGGLYEGYPEFREYLDEALVEILGEEVARTVTLEVTVDGS  
GAG AALLAAVHSSNRQQGSI

>Zma | XP\_008675068.1

MAKGGAVVGTAVVVCAAAAAAVGVAVVLSRRRSRRREAEDERKRKAAAVIEEVEQRLSTP  
TALLRGIADAMVEEMERGLRAEPHAPLKMLISYVDNLP TGDEHGLFYALDLGGTNFRVIR  
VQLGGRDRRVVKQYEEVSI PPHLMVGTSTELFDFIAAELEK FVRTEGEDFHL PDSKQRE  
LGF TFSFPVHQTSISSGTLIKWTKGFCINGTVGEDVVAELSRAMERQGLDMKVAALVNDT  
VGTLAGGRYADNDVVAAVILGTGTNAAYVEHANVIPKWTG LLLPRSGNMVINMEWGNFRSD  
KLPRSEYDKSLDFESLNPGEQIYEKMISSGMYLGEIVRRILLKLAHDASLFGDVVPPKLEQ  
LFILRTPDMSAMHHDTS HDLKHGAKLKDILGVPDTSLEARYITLHVCDLVAERGARLAA  
AGIYGILKKGKDKLLGDFSQRTVVAIDGGLYEHYK KFSACLEATLTDLLGEEVASSVV  
VKLANDGSGIGAALLAASHSQYAEAA

>Zma | XP\_035817780.1

MGRVGLGVAAGCAAATCAIAAALVARRASARARWRRRAVALLREFEDGCATPPPRLRQVVD  
AMVEMHAGLASDGGSKLKMLLTFVDALPAGNEEGTYYSIDLGGTNFRVLRVEVGAGSVV  
TRRKVELPIPEELTKGTIEELFN FVAMTLKEFVETEDGNDEQRALGF TFSFPVRQTSVSS  
GSLIRWNGFLIEDAVGKDVAQCLNEALARNGLNVRVTALVNDTVGTLALGHYHDED TVA  
AVIIGAGTNACYIERTDAI IKCQGLLTNSGGMVVNMEWGSFWSSHLPRTPYDISL DDETQ  
NRNDQGF EKMVSGIYLGEIARLVLRMALESDFFGDAADNLCTPFTLSTPLLA AIRKDDS  
PDLSEVRKILQEHLKIPDTP LKTRRLVVKVCDIVTRRAARLAAAGIVGILK KLRDGS  
GVA ASSGRTGGQMRRTVVAIEGGLYEGYPVFREYLDEALVEILGEEVARTVALRVTV DGS  
GAG AALLAAVHSSNRQQGSI

>Zma | XP\_035817781.1

MGRVGLGVAAGCAAATCAIAAALVARRASARARWRRRAVALLREFEDGCATPPPRLRQVVD  
AMVEMHAGLASDGGSKLKMLLTFVDALPAGNEEGTYYSIDLGGTNFRVLRVEVGAGSVV  
TRRKVELPIPEELTKGTIEELFN FVAMTLKEFVETEDGNDEQRALGF TFSFPVRQTSVSS  
GSLIRWNGFLIEDAVGKDVAQCLNEALARNGLNVRVTALVNDTVGTLALGHYHDED TVA

AVIIIGAGTNACYIERTDAI IKCQGLLTNSGGMVVNMEWGSFWSSHLPRTPYDISLDDDETQ  
NRNDQGFVKMVSIGIYLGEIARLVLHRMALESDFFGDAADNLCTPFTLSTPLLAIRKDDSD  
PDLSEVRKILQEHLKIPDTPLKTRRLVVKVCDIVTRRAARLAAAGIVGILKKLGRDGSV  
ASSGRTGGQMRRTVVAIEGGLYEGYPVFREYLDEALVEILGEEVARTVALRVTVDGSAG  
AALLAAVHSSNRQQGSI

>Zma | XP\_035817782.1

MGRVGLGVAAGCAAATCAIAAALVARRASARARWRRRAVALLREFEDGCATPPPRLRQVVD  
AMVEMHAGLASDGGSKLKMLLTFVDALPAGNEEGTYYSIDLGGTNFRVLRVEVGAGSVV  
TRRKVELPIPEELTKGTIEELFNFMVAMTLKEFVETEDGNDEQRALGFTFSFPVRQTSVSS  
GSLIRWNGFLIEDAVGKDVAQCLNEALARNGLNVRVTALVNDTVGTLALGHYHDEDTVA  
AVIIIGAGTNACYIERTDAI IKCQGLLTNSGGMVVNMEWGSFWSSHLPRTPYDISLDDDETQ  
NRNDQGFVKMVSIGIYLGEIARLVLHRMALESDFFGDAADNLCTPFTLSTPLLAIRKDDSD  
PDLSEVRKILQEHLKIPDTPLKTRRLVVKVCDIVTRRAARLAAAGIVGILKKLGRDGSV  
ASSGRTGGQMRRTVVAIEGGLYEGYPVFREYLDEALVEILGEEVARTVALRVTVDGSAG  
AALLAAVHSSNRQQGSI

>HXK3-Mazzard-F12/1

MSVAATSPAVGSFYLRRRSPSTAMSMRFRMAVRSAAVSVTPLLTKLHNSATPLPLLRH  
VADAMAADMRAGLAVEGGSDLKMILSYVDSLPSGNEEGLFYALDLGGTNFRVLRVQLGGK  
QERVIAEFDQVSIPKELMFGTSEQLFDFIAAGLAKFAQKEGNKFHLPTGTKREIGFTFS  
FPVKQTSIDSGILIKWTKGFSVSGTAGKDVVACLNEAMERQGLDMRVSALVNDTVGTLAG  
ARYWDDDDVMVAVILGTGTNACYVERADAI PKLQGVSSSGKTIINTEWGAFSDGLPLTEF  
DREMDAASINPGEQIFEKTI SGMYLGEIVRRVLVKMAEADALFGESVPEKLSTPFVLRTP  
DICAMQQDISDDLQDVGSILYNVAGVESNLSARKIVVDVCDTIVKRGGRLAGAGIVGILQ  
KMEEDSKDLIFGKRTVVAMDGGLYENYPQYRRYLQEAVTELLGTEISKNVVIEHSDGSG  
IGaallAAANSQYA

>HXK3-Mariana2624

MSVAATSPSVGSFYLRRRSPSTPMSMFRMAVRSAAVSVTPLLTKLHNSATPLPLLRH  
VADAMAADMRAGLAVEGGSDLKMILSYVDSLPSGNEEGLFYALDLGGTNFRVLRVQLGGK  
QERVIAEFDQVSIPKELMFGTSEQLFDFIASGLAKFAQKEGNKFHLPTGTKREIGFTFS  
FPVKQTSIDSGILIKWTKGFSVSGTAGKDVVACLNEAMERRGLDMRVSALVNDVAVGTLAG  
ARYWDDDDVMVAVILGTGTNACYVERAEAI PKLQGVSSSGRTIINTEWGAFSDGLPLTEF  
DREMDAASINPGEQIFEKTI SGMYLGEIVRRVLVKMAEADALFGESVPEKLSTPFALRTP  
DICAMQQDISDDLQDVGSILYNVAGVESNLSARKIVVDVCDTIVKRGGRLAGAGIVGILQ  
KMEEDSKGLIFGKRTVVAMDGGLYANYPQYRRYLQEAVTELLGTEISKNVVIELTKDGS  
IGaallAAANSQYA
